# Supplementary material for: Emerging investigator series: it's not all about the ion: support for particle-specific contributions to silver nanoparticle antimicrobial activity
Source: Royal Society of Chemistry journal article supplement (doi:10.1039/c8en00429c), 2018-01-01
Supplement: c8en00429c1.pdf [file c8en00429c1.pdf]

---

Supporting Information

## It's Not All About the Ion: Support for Particle-Specific Contributions to Silver Nanoparticle Antimicrobial Activity

Lisa M. Stabryla,<sup>a</sup> Kathryn A. Johnston,<sup>b</sup> Jill E. Millstone,<sup>b,c,d</sup> and Leanne M. Gilbertson\*,<sup>a</sup>

<sup>a</sup> Department of Civil and Environmental Engineering, University of Pittsburgh, 3700 O'Hara Street, Pittsburgh, PA 15261

<sup>b</sup> Department of Chemistry, University of Pittsburgh, 219 Parkman Avenue, Pittsburgh, PA 15260

<sup>c</sup> Department of Chemical and Petroleum Engineering, University of Pittsburgh, 3700 O'Hara Street, Pittsburgh, PA 15261

<sup>d</sup> Department of Mechanical Engineering and Materials Science, University of Pittsburgh, 3700 O'Hara Street, Pittsburgh, PA 15261

---

Table of Contents:

|                                                                                             |        |
|---------------------------------------------------------------------------------------------|--------|
| <b>Total Ag atom calculations</b> .....                                                     | P. S2  |
| <b>Surface Ag atom calculations</b> .....                                                   | P. S3  |
| <b>Table S1</b> – Compiled qualitative and empirical data from final subset.....            | P. S5  |
| <b>Table S2</b> – Results of ionization calculations from final subset .....                | P. S12 |
| <b>Figure S1</b> – Comparison of appropriate and inappropriate ion controls.....            | P. S21 |
| <b>Figure S2</b> – Reported versus theoretically calculated dissolution .....               | P. S21 |
| <b>Figure S3</b> – Effect of AgNP concentration on conclusions drawn .....                  | P. S22 |
| <b>Figure S4</b> – Effect of post-synthesis purification on conclusions drawn .....         | P. S22 |
| <b>Figures S5</b> – Effect of dissolution monitoring method on conclusions drawn .....      | P. S23 |
| <b>Figures S6</b> – Effect of dissolution monitoring time points on conclusions drawn ..... | P. S24 |
| <b>Figures S7</b> – Effect of gram-stain of organism on conclusions drawn .....             | P. S24 |
| <b>References</b> .....                                                                     | P. S25 |

## Total Ag atom calculations

### Ag salt control

Under the alternate assumption – that the reported concentration was of total Ag salt rather than Ag atom – the molecular weight would change from 107.87 g/mol (corresponding to Ag) to that of the Ag salt (e.g., 169.87 g/mol for AgNO<sub>3</sub>, 166.91 g/mol for AgC<sub>2</sub>H<sub>3</sub>O<sub>2</sub>, 311.80 g/mol for Ag<sub>2</sub>SO<sub>4</sub>). The molar ratio would also need to be incorporated here. For a reported concentration

of  $0.4 \frac{\mu\text{g}}{\text{mL}}$  AgNO<sub>3</sub>:

$$0.4 \frac{\mu\text{g}}{\text{mL}} \text{AgNO}_3 * \frac{1 \text{ g}}{10^6 \mu\text{g}} * \frac{1 \text{ mol}}{169.87 \text{ g}} * \frac{1 \text{ mol Ag}}{1 \text{ mol AgNO}_3} = 2.35 \times 10^{-9} \frac{\text{mol Ag(I)}}{\text{mL}} \text{ as AgNO}_3,$$

which is not significantly different from  $3.71 \times 10^{-9} \frac{\text{mol Ag(I)}}{\text{mL}} \text{ as AgNO}_3$  (assuming the reported concentration is of total Ag atom).

### AgNP

The alternate assumption – that the reported concentration was of total AgNP rather than Ag atom – requires including the mass of the ligand, which depends on the number of ligands appended to the particle. Since the majority of studies do not include this information, the mass of the ligand was ignored for the purposes of this example calculation. For a 25 nm particle, the number of total Ag atoms and thus the weight of the AgNP is:

$$\frac{4.85 \times 10^5 \text{ atoms Ag}}{\text{AgNP}} (\text{for a 25 nm AgNP}) * \left( \frac{107.87 \text{ g}}{1 \text{ atom Ag}} \right) \\ = \left( \frac{5.19 \times 10^7 \text{ g Ag}}{\text{AgNP}} \right) * \left( \frac{6.02 \times 10^{23} \text{ AgNPs}}{1 \text{ mol AgNPs}} \right) = \frac{3.13 \times 10^{31} \text{ g Ag}}{1 \text{ mol AgNPs}}$$

For a reported concentration of  $0.4 \frac{\mu\text{g}}{\text{mL}}$  AgNPs:

$$0.4 \frac{\mu\text{g}}{\text{mL}} \text{AgNPs} * \left( \frac{1 \text{ g}}{10^6 \mu\text{g}} \right) * \left( \frac{1 \text{ mol AgNP}}{3.13 \times 10^{31} \text{ g Ag}} \right) = 1.28 \times 10^{-36} \frac{\text{mol AgNPs}}{\text{mL}}$$

The associated extent of necessary AgNP oxidation is unrealistic (10<sup>29</sup>%) and resulted in rejection of every study for having an overestimated ion control.



## Surface Ag atom calculations

### General considerations for Ag

Ag has face-centered cubic (FCC) lattice structure:

$$\text{Unit cell} = 6 * \frac{1}{2} + 8 * \frac{1}{8} = 4 \frac{\text{Ag atoms}}{\text{unit cell}}$$

$$\text{Unit cell} = 4 * \frac{1}{8} + 1 * \frac{1}{2} = 1 \frac{\text{Ag atom}}{\text{surface unit cell}}$$

Ag lattice constant ( $a_{lat}$ ) = 0.408 nm

$$\text{Unit cell volume (nm}^3\text{)} = a_{lat}^3$$

$$\text{Bond length (BL)} = 2r = \frac{\sqrt{2}a_{lat}}{2} = \frac{a_{lat}}{\sqrt{2}}$$

$$SA_{(111)} = \frac{\sqrt{3}BL^2}{2}$$

$$SA_{(110)} = BL * a_{lat}$$

$$SA_{(100)} = BL^2$$

Unit cell surface area (nm<sup>2</sup>)

$$= (\%(111)) * (SA_{(111)}) + (\%(110)) * (SA_{(110)}) + (\%(100)) * (SA_{(100)})$$

$$\text{Volume (nm}^3\text{)} * \left( \frac{1 \text{ unit cell}}{V \text{ (nm}^3\text{)}} \right) * \left( \frac{4 \text{ Ag atoms}}{\text{unit cell}} \right) = \text{total number of Ag atoms}$$

$$\text{Surface area (nm}^2\text{)} * \left( \frac{1 \text{ unit cell}}{SA \text{ (nm}^2\text{)}} \right) * \left( \frac{1 \text{ Ag atom}}{\text{unit cell}} \right) = \text{number of surface Ag atoms}$$

### Sphere approximated as a cuboctahedron

Particle radius ( $r$ ) = 25 nm

$$V_{\text{sphere}} = \frac{4}{3}\pi r^3 = 65,450 \text{ nm}^3$$

$$SA_{\text{sphere}} = 4\pi r^2 = 7,854 \text{ nm}^2$$

A cuboctahedron has 8 (111) faces as equilateral triangles and 6 (100) faces as squares.<sup>1</sup> The relative percentage of each surface facet was determined using the edge length (E) as it defines the size of the 8 triangles and 6 squares:

$$A_{8 \text{ triangles}} = 8 * \frac{b * h}{2} = 8 * \frac{E * E\sqrt{3}}{2} = 2 * \sqrt{3} * E^2$$

$$A_{6 \text{ squares}} = 6E^2$$

$$A_{total} = A_{8 \text{ triangles}} + A_{6 \text{ squares}}$$

$$\% (111) = \frac{A_{8 \text{ triangles}}}{A_{total}} = \frac{2 * \sqrt{3} * E^2}{2 * \sqrt{3} * E^2 + 6E^2} = 0.366$$

$$\% (100) = \frac{A_{6 \text{ squares}}}{A_{total}} = \frac{6E^2}{2 * \sqrt{3} * E^2 + 6E^2} = 0.634$$

Unit cell surface area (nm<sup>2</sup>)

$$= (0.366) * (SA_{(111)}) + (0) * (SA_{(110)}) + (0.634) * (SA_{(100)}) = 0.079$$

Total number of Ag atoms = 3, 854,678 Ag atoms

Number of Ag surface atoms = 99, 228 Ag surface atoms

$$\% \text{ Ag surface atoms} = \% \text{ ionization} = \frac{\text{Ag surface atoms}}{\text{total Ag atoms}} * 100 = 2.57\%$$

Nanorod/wire approximated as a cylinder with half spheres on each end

Length (l) = 6755 nm

Width (w)/Diameter(d) = 82 nm

$$V_{total} = V_{sphere} + V_{cylinder} = \frac{4}{3}\pi r^3 + \pi r^2 h = 35,528,924 \text{ nm}^3$$

$$SA_{total} = SA_{sphere} + SA_{cylinder} = 4\pi r^2 + 2\pi r h = 1,740,159 \text{ nm}^2$$

A nanorod/wire has 2 (111) faces as the half spheres while the side surface is a (100) face.<sup>2</sup> The relative percentage of each surface facet was determined using the edge length (E) as it defines the size of the 8 triangles and 6 squares:

$$A_{sphere} = 4\pi r^2$$

$$A_{cylinder} = 2\pi r h$$

$$A_{total} = A_{sphere} + A_{cylinder}$$

$$\% (111) = \frac{A_{sphere}}{A_{total}} = \frac{4\pi r^2}{4\pi r^2 + 2\pi r h} = 0.0121$$

$$\% (100) = \frac{A_{cylinder}}{A_{total}} = \frac{2\pi r h}{4\pi r^2 + 2\pi r h} = 0.988$$

$$\begin{aligned} \text{Unit cell surface area (nm}^2\text{)} \\ = (0.0121) * (SA_{(111)}) + (0) * (SA_{(110)}) + (0.988) * (SA_{(100)}) = 0.083 \end{aligned}$$

Total number of Ag atoms = 2,092,481,147 Ag atoms

Number of Ag surface atoms = 20,941,396 Ag surface atoms

$$\% \text{ Ag surface atoms} = \% \text{ ionization} = \frac{\text{Ag surface atoms}}{\text{total Ag atoms}} \times 100 = 1.00\%$$

**Table S1.** Compilation of qualitative and empirical data reported in the final subset of studies used for the pivot table analysis

| Refs      | Species or organism group                                                                                     | Exposure medium                     | AgNP size (nm) <sup>a</sup> | AgNP shape                                             | Surface ligand (zeta potential mV)                          | Ligand control present | AgNP synthesis method                                                                                                                                                                  | Purification procedure                                                                                                                                                                                                                                      | AgNP conc. characterization method | Aggregation monitoring method (time) | Additional characterization                                  | Assay                                                                     | Endpoint                                                                   | Conclusion drawn                     |
|-----------|---------------------------------------------------------------------------------------------------------------|-------------------------------------|-----------------------------|--------------------------------------------------------|-------------------------------------------------------------|------------------------|----------------------------------------------------------------------------------------------------------------------------------------------------------------------------------------|-------------------------------------------------------------------------------------------------------------------------------------------------------------------------------------------------------------------------------------------------------------|------------------------------------|--------------------------------------|--------------------------------------------------------------|---------------------------------------------------------------------------|----------------------------------------------------------------------------|--------------------------------------|
| 3         | <i>E. coli</i> nonmutated Strain BW25113, biosensor <i>E. coli</i> MC1061 (pcuer/pcopAlux) and MC106 (pSLIux) | LB with 5% FBS and some antibiotics | 9.1 ± 4.2                   | sphere                                                 | citrate (-26.3 ± 2.6)                                       | yes – not toxic        | purchased from Nanocomposix                                                                                                                                                            | --                                                                                                                                                                                                                                                          | GF-AAS                             | DLS (duration)                       | --                                                           | growth, biosensor, gene deletion, AFM/TEM                                 | IC <sub>50</sub> , bioavailable Ag, gene regulation, AgNP-cell interaction | particle-only, combined ion-particle |
|           |                                                                                                               |                                     | 19.1 ± 6.0                  |                                                        |                                                             |                        |                                                                                                                                                                                        |                                                                                                                                                                                                                                                             |                                    |                                      |                                                              |                                                                           |                                                                            |                                      |
|           |                                                                                                               |                                     | 43.5 ± 12                   |                                                        |                                                             |                        |                                                                                                                                                                                        |                                                                                                                                                                                                                                                             |                                    |                                      |                                                              |                                                                           |                                                                            |                                      |
|           |                                                                                                               |                                     | 17.9 ± 7.0                  | sphere                                                 | PVP (-10.7 ± 1.8)                                           | yes – not toxic        | synthesized using AgNO <sub>3</sub> and NaBH <sub>4</sub>                                                                                                                              | ultrafiltration system (Spectrum Laboratories, Inc.) equipped with a 10 kDa polyethersulfone membrane (MidiKros Hollow Fiber Module (P-X3-010E-300-02N))                                                                                                    |                                    |                                      |                                                              |                                                                           |                                                                            |                                      |
| 23.3 ± 15 | sphere                                                                                                        | BPEI (+33.3 ± 1.5)                  | yes – not toxic             | synthesized using AgNO <sub>3</sub> and UV irradiation |                                                             |                        |                                                                                                                                                                                        |                                                                                                                                                                                                                                                             |                                    |                                      |                                                              |                                                                           |                                                                            |                                      |
| 4         | <i>E. coli</i> K12 ATCC 25404                                                                                 | NaHCO <sub>3</sub> buffer           | 35.4 ± 5.1 <sup>b</sup>     | sphere                                                 | amorphous carbon (-27 ± 1.54 anaerobic, -30 ± 0.42 aerobic) | --                     | purchased from Novacentrix Corporation                                                                                                                                                 | washed 5 times with 1% HNO <sub>3</sub> and 5 times with deoxygenated (N <sub>2</sub> -purged) water inside an anaerobic chamber, filtration through a cellulose membrane (MWCO 10 kDa) using an Amicon stir cell (Millipore, MA) pressurized with nitrogen | ICP-OES/MS                         | --                                   | --                                                           | plate counting, dose-response, MLC assay                                  | viable cell number (CFU), log reduction, MLC                               | ion-only, combined ion-particle      |
| 5         | <i>E. coli</i> K12 ATCC 25404                                                                                 | NaHCO <sub>3</sub> minimal media    | 2.8 ± 0.47                  | sphere                                                 | PEG (-16.1 ± 1.2)                                           | --                     | synthesized by reaction of tetrachloroauric acid or Ag <sub>2</sub> C <sub>2</sub> H <sub>3</sub> O <sub>2</sub> with oleylamine in refluxing toluene, hexane, or 1,2-dichloro-benzene | --                                                                                                                                                                                                                                                          | --                                 | --                                   | --                                                           | growth inhibition                                                         | EC <sub>50</sub> , % live dead                                             | ion-only                             |
|           |                                                                                                               |                                     | 4.7 ± 0.2                   |                                                        |                                                             |                        |                                                                                                                                                                                        |                                                                                                                                                                                                                                                             |                                    |                                      |                                                              |                                                                           |                                                                            |                                      |
|           |                                                                                                               |                                     | 10.5 ± 0.59                 |                                                        |                                                             |                        |                                                                                                                                                                                        |                                                                                                                                                                                                                                                             |                                    |                                      |                                                              |                                                                           |                                                                            |                                      |
|           |                                                                                                               |                                     | 17.5 ± 2.9                  | sphere                                                 | PVP (-27.5 ± 1.4)                                           | --                     | commercially available from NanoAmor                                                                                                                                                   |                                                                                                                                                                                                                                                             |                                    |                                      |                                                              |                                                                           |                                                                            |                                      |
|           |                                                                                                               |                                     | 51.4 ± 18.7                 |                                                        |                                                             |                        |                                                                                                                                                                                        |                                                                                                                                                                                                                                                             |                                    |                                      |                                                              |                                                                           |                                                                            |                                      |
|           |                                                                                                               |                                     | 71.5 ± 20.3                 |                                                        |                                                             |                        |                                                                                                                                                                                        |                                                                                                                                                                                                                                                             |                                    |                                      |                                                              |                                                                           |                                                                            |                                      |
| 6         | <i>E. coli</i> K12 MG 1655                                                                                    | modified LB lacking NaCl            | 142 ± 20                    | sphere                                                 | --                                                          | --                     | synthesized in the vapor phase                                                                                                                                                         | --                                                                                                                                                                                                                                                          | --                                 | --                                   | SEM and XRD to characterize NP composition, BET surface area | timed release Ag toxicity, growth curve, viable plate counts, TEM, RT-PCR | viable cell number (CFU), AgNP-cell interaction, fold change               | combined ion-particle                |
| 7         | <i>E. coli</i> K12 MG 1655                                                                                    | modified LB lacking NaCl            | 142 ± 20                    | sphere                                                 | --                                                          | --                     | synthesized in the vapor phase                                                                                                                                                         | --                                                                                                                                                                                                                                                          | --                                 | --                                   | SEM/EDX for composition                                      | plate counts, growth curve, gene expression                               | viable cell number (CFU), fold change                                      | combined ion-particle                |

|    |                                                                         |                                                      |                          |        |                         |                    |                                                                                                                                                                                                                                  |                                                                                                                                                                   |         |                           |                                                                                                                                                                            |                                                                                        |                                                                                                                |                          |
|----|-------------------------------------------------------------------------|------------------------------------------------------|--------------------------|--------|-------------------------|--------------------|----------------------------------------------------------------------------------------------------------------------------------------------------------------------------------------------------------------------------------|-------------------------------------------------------------------------------------------------------------------------------------------------------------------|---------|---------------------------|----------------------------------------------------------------------------------------------------------------------------------------------------------------------------|----------------------------------------------------------------------------------------|----------------------------------------------------------------------------------------------------------------|--------------------------|
| 8  | <i>S. aureus</i> ATCC 6538,<br><i>E. coli</i> ATCC 10536                | ISB, TSB,<br>PBS<br>Dulbecco's<br>and HEPES,<br>CAPS | 7 ± 4                    | sphere | glutathione             | --                 | mixed AgNO <sub>3</sub> ,<br>sodium citrate, and<br>NaBH <sub>4</sub> .                                                                                                                                                          | Centrifugation and<br>pellet precipitation                                                                                                                        | ICP-OES | UV-vis, DLS<br>(duration) | Mie's effective<br>refractive index<br>for substitution<br>of the citrate<br>capping layer,<br>TGA, SEM EDS<br>for composition,<br>XRPD and FT-IR<br>for capping<br>agents | microarray<br><br>standard<br>broth macro-<br>dilution<br>method,<br>plate<br>counting | ME, MIC                                                                                                        | particle-<br>only        |
| 9  | <i>T. pseudonana</i> CCMP<br>1335, <i>Synechococcus</i><br>sp. PCC 6911 | artificial<br>seawater<br>and<br>freshwater          | 21.6                     | sphere | maltose<br>(-38)        | --                 | D-maltose<br>monohydrate and<br>AgNO <sub>3</sub> added to<br>NaBH <sub>4</sub>                                                                                                                                                  | --                                                                                                                                                                | --      | DLS<br>(duration)         | CPS for size                                                                                                                                                               | dose<br>response                                                                       | % growth<br>inhibition                                                                                         | combined<br>ion-particle |
|    |                                                                         |                                                      | 39                       |        | maltose<br>(-49)        |                    | modified Tollens<br>process - chemical<br>reduction of<br>[Ag(NH <sub>3</sub> ) <sub>2</sub> ] <sup>+</sup> by sugars<br>(mix of AgNO <sub>3</sub> ,<br>NH <sub>4</sub> OH, and NaOH -<br>vary the latter two to<br>control size | --                                                                                                                                                                |         |                           |                                                                                                                                                                            |                                                                                        |                                                                                                                |                          |
|    |                                                                         |                                                      | 97.4                     |        | maltose<br>(-48)        |                    |                                                                                                                                                                                                                                  | --                                                                                                                                                                |         |                           |                                                                                                                                                                            |                                                                                        |                                                                                                                |                          |
| 10 | <i>N. europaea</i> ATCC<br>19718                                        | AOB<br>medium                                        | 25.2 ± 9.3               | sphere | citrate<br>(-23 ± 1.1)  | yes –<br>not toxic | AgNO <sub>3</sub> reduced with<br>citrate                                                                                                                                                                                        | --                                                                                                                                                                | ICP-MS  | TEM, DLS                  | --                                                                                                                                                                         | micro BCA<br>protein<br>assay,<br>live/dead,<br>TEM, gene<br>expression                | % reduction<br>in nitrite<br>production,<br>membrane<br>integrity,<br>AgNP-cell<br>interaction,<br>fold change | ion-only                 |
|    |                                                                         |                                                      | 27 ± 6.5                 | sphere | GA<br>(-21 ± 1.3)       | yes –<br>not toxic | AgNO <sub>3</sub> reduced with<br>GA                                                                                                                                                                                             | diluted and<br>centrifuged three<br>times before<br>resuspending in water                                                                                         |         |                           |                                                                                                                                                                            |                                                                                        |                                                                                                                |                          |
|    |                                                                         |                                                      | 21 ± 17                  | sphere | PVP<br>(-11.6 ±<br>1.8) | yes –<br>not toxic | purchased from<br>Nanostructured and<br>Amorphous<br>Materials, Inc.                                                                                                                                                             | --                                                                                                                                                                |         |                           |                                                                                                                                                                            |                                                                                        |                                                                                                                |                          |
| 11 | PolySeed ( <i>Bacillus</i> sp.)                                         | BOD5 test<br>medium                                  | 58 ± 11                  | sphere | hydrogen<br>(-22)       | yes –<br>not toxic | Ag <sub>2</sub> O heated and<br>then bubbled with H <sub>2</sub>                                                                                                                                                                 | system from Spectrum<br>Laboratories, Inc.<br>ultrafiltration<br>membrane 10 kDa<br>polyethersulfone<br>(MidiKros Hollow Fiber<br>Module (P-X3-010E-<br>300-02N)) | AAS     | DLS                       | XPS, NMR, and<br>conductivity<br>(Orion<br>013010MD<br>conductivity<br>cell) for purity                                                                                    | five day<br>oxygen<br>consumption<br>test;<br>live/dead<br>BaClight,<br>TEM            | oxygen<br>consumption<br>, % live<br>bacteria,<br>AgNP-cell<br>interaction                                     | particle-<br>only        |
|    |                                                                         |                                                      | 19 ± 5                   |        | citrate<br>(-38)        | yes –<br>not toxic | AgNO <sub>3</sub> reduced with<br>citrate                                                                                                                                                                                        |                                                                                                                                                                   |         |                           |                                                                                                                                                                            |                                                                                        |                                                                                                                |                          |
|    |                                                                         |                                                      | 12 <sup>b</sup>          |        | PVP<br>(-10)            | yes –<br>not toxic | AgNO <sub>3</sub> added<br>dropwise to an<br>NaBH <sub>4</sub> and PVP<br>solution                                                                                                                                               |                                                                                                                                                                   |         |                           |                                                                                                                                                                            |                                                                                        |                                                                                                                |                          |
|    |                                                                         |                                                      | 10 ± 4                   |        | BPEI<br>(+40)           | yes –<br>not toxic | BPEI<br>and AgNO <sub>3</sub> dissolved<br>in HEPES separately,<br>mixed together, and<br>exposed to UV light                                                                                                                    |                                                                                                                                                                   |         |                           |                                                                                                                                                                            |                                                                                        |                                                                                                                |                          |
| 12 | <i>E. coli</i> ATCC 25922                                               | PBS                                                  | 20.3 ± 1.9<br>53.1 ± 4.1 | sphere | phosphate<br>monolayer  | --                 | bought from<br>Nanocompositix                                                                                                                                                                                                    | extensive washing                                                                                                                                                 | ICP-MS  | TEM<br>(duration)         | DLS for HDD,<br>UV-vis for size                                                                                                                                            | plating assay                                                                          | MBC                                                                                                            | ion-only                 |



|           |                                                                                                                                                                                                                                                                                                                                                                                |                      |                    |        |                              |                 |                                                                                                                                                                          |    |        |                      |                                                                               |                                                                                      |                                                                                                       |                       |  |
|-----------|--------------------------------------------------------------------------------------------------------------------------------------------------------------------------------------------------------------------------------------------------------------------------------------------------------------------------------------------------------------------------------|----------------------|--------------------|--------|------------------------------|-----------------|--------------------------------------------------------------------------------------------------------------------------------------------------------------------------|----|--------|----------------------|-------------------------------------------------------------------------------|--------------------------------------------------------------------------------------|-------------------------------------------------------------------------------------------------------|-----------------------|--|
|           |                                                                                                                                                                                                                                                                                                                                                                                |                      | 112.6 ± 7.8        |        |                              |                 | (synthesized using aqueous reduction from Ag salts in phosphate buffer)                                                                                                  |    |        |                      |                                                                               |                                                                                      |                                                                                                       |                       |  |
| 13        | <i>V. fischeri</i> DSMZ                                                                                                                                                                                                                                                                                                                                                        | 2% NaCl              | 20                 | sphere | -11                          | --              | purchased from PlasmaChem GmbH                                                                                                                                           | -- | ICP-MS | DLS                  | SEM, high-resolution (HR)-SEM, FTIR                                           | standard inhibition of bioluminescence                                               | % lumin-escence                                                                                       | combined ion-particle |  |
|           |                                                                                                                                                                                                                                                                                                                                                                                |                      | 200                |        | -12.65                       | --              |                                                                                                                                                                          |    |        |                      |                                                                               |                                                                                      |                                                                                                       |                       |  |
|           |                                                                                                                                                                                                                                                                                                                                                                                |                      | 23                 |        | -10.85                       | --              | synthesized by <i>Ocimum sanctum</i> plant leaf extract                                                                                                                  |    |        |                      |                                                                               |                                                                                      |                                                                                                       |                       |  |
|           |                                                                                                                                                                                                                                                                                                                                                                                |                      | 27                 |        | -13.5                        | --              | synthesized by <i>Azadirachta indica</i> plant leaf extract                                                                                                              |    |        |                      |                                                                               |                                                                                      |                                                                                                       |                       |  |
| 14        | <i>E. coli</i> AB1157 (pSLlux), <i>E. coli</i> J1130 (pSLlux), <i>E. coli</i> J1131 (pSLlux), <i>E. coli</i> AS393 (pSLlux), <i>E. coli</i> J1132 (pSLlux), <i>E. coli</i> AS391 (pSLlux), <i>E. coli</i> K12::lux, <i>E. coli</i> MC1061 (pDNIlux), <i>E. coli</i> 12::soxRSsodAlux, <i>E. coli</i> MC1061 (pSLzntR/pDNPzntAlux), <i>E. coli</i> MC1061 (pSLcueR/pDNPcopAlux) | 0.9% NaCl            | < 100 <sup>c</sup> | sphere | --                           | --              | purchased from Sigma Aldrich                                                                                                                                             | -- | --     | SEM                  | SEM, TEM                                                                      | growth assay, luminescent bacterial test, luciferin-luciferase method                | maximal growth rate, EC <sub>50</sub> , EC <sub>99</sub> , induction of bioluminescence, ATP content  | combined ion-particle |  |
| 15        | <i>E. coli</i> K12 BW30270, <i>P. fluorescens</i> OS8                                                                                                                                                                                                                                                                                                                          | ultrapure water      | 11.6 ± 5.2         | sphere | citrate (-25)                | --              | purchased from MK Nano (Missisauga, Canada)                                                                                                                              | -- | --     | DLS                  | single particle (SP)-ICP-MS for size, SEM-EDS for size and morphology, UV-vis | plating, ROS, and bioluminescence assays                                             | CFU/mL, EC <sub>50</sub> , ROS production, fold induction bioluminescence                             | combined ion-particle |  |
|           |                                                                                                                                                                                                                                                                                                                                                                                |                      | 17.8 ± 8           |        | citrate (-25)                |                 |                                                                                                                                                                          |    |        |                      |                                                                               |                                                                                      |                                                                                                       |                       |  |
|           |                                                                                                                                                                                                                                                                                                                                                                                |                      | 47.7 ± 8           |        | citrate (-24)                |                 |                                                                                                                                                                          |    |        |                      |                                                                               |                                                                                      |                                                                                                       |                       |  |
|           |                                                                                                                                                                                                                                                                                                                                                                                |                      | 56.5 ± 9.6         |        | citrate (-15)                |                 |                                                                                                                                                                          |    |        |                      |                                                                               |                                                                                      |                                                                                                       |                       |  |
| 94.8 ± 54 | citrate (-16)                                                                                                                                                                                                                                                                                                                                                                  |                      |                    |        |                              |                 |                                                                                                                                                                          |    |        |                      |                                                                               |                                                                                      |                                                                                                       |                       |  |
| 16        | <i>E. coli</i> AB1157, <i>E. coli</i> K12 MC 4100, <i>E. coli</i> K12 TK 821, <i>E. coli</i> K12 MH 1471, <i>E. coli</i> K12 MH 225, <i>E. coli</i> K12 MG1655 (pKatG::lux), <i>P. aeruginosa</i> PAO1, <i>P. chlororaphis</i> 449, <i>S. proteamaculans</i> 94, <i>S. liquefaciens</i> MG1 and MG44                                                                           | Difco nutrient broth | 8.3 ± 1.9          | sphere | hydrolyzed casein peptides   | --              | prepared Ag oxide by adding AgNO <sub>3</sub> to 20% NaOH. Reduced Ag oxide with hydrolyzed casein peptides                                                              | -- | --     | SEM (one time point) | --                                                                            | MIC assay, MTT assay, live/dead Baclight assay, biosensor assay, mutant growth assay | MIC, biofilm formation, bioluminescence, H <sub>2</sub> O <sub>2</sub> concentration, gene regulation | combined ion-particle |  |
| 17        | <i>E. coli</i> , <i>S. aureus</i>                                                                                                                                                                                                                                                                                                                                              | LB                   | 6                  | sphere | --                           | --              | prepared by the solvated metal atom dispersion method, which involves covaporization of Ag and solvent (acetone) onto a liquid N <sub>2</sub> cooled surface that warms. | -- | --     | TEM (one time point) | SEM/XRD/EDX for morphology, BET surface area                                  | plate counting                                                                       | number of surviving bacteria colonies                                                                 | ion-only              |  |
|           |                                                                                                                                                                                                                                                                                                                                                                                |                      |                    |        | 3-mercapto-1,2-propanediol   | yes – not toxic |                                                                                                                                                                          |    |        |                      |                                                                               |                                                                                      |                                                                                                       |                       |  |
|           |                                                                                                                                                                                                                                                                                                                                                                                |                      |                    |        | sodium 3-mercapto-1-propane- | yes – not toxic |                                                                                                                                                                          |    |        |                      |                                                                               |                                                                                      |                                                                                                       |                       |  |

|    |                                                               |                                                                                  | 1000 – 5000       | sphere              | sulfonate, sodium 5-mercapto-1-tetrazoleacetate | yes – not toxic | Ligands added and then heat treated, air exposed, and KOH exposed                                                                                             |                     |        |                |        |                                                                        |                                                                                                                                                              |                       |
|----|---------------------------------------------------------------|----------------------------------------------------------------------------------|-------------------|---------------------|-------------------------------------------------|-----------------|---------------------------------------------------------------------------------------------------------------------------------------------------------------|---------------------|--------|----------------|--------|------------------------------------------------------------------------|--------------------------------------------------------------------------------------------------------------------------------------------------------------|-----------------------|
|    |                                                               |                                                                                  |                   |                     | Ag <sub>2</sub> O                               | yes – not toxic | purchased from Aldrich                                                                                                                                        |                     |        |                |        |                                                                        |                                                                                                                                                              |                       |
|    |                                                               |                                                                                  |                   |                     | AgO                                             | yes – not toxic |                                                                                                                                                               |                     |        |                |        |                                                                        |                                                                                                                                                              |                       |
| 18 | <i>B. subtilis</i> UD1022, <i>E. coli</i> OP50                | LB                                                                               | 44.9 ± 7.2        | sphere <sub>d</sub> | citrate (-40.7)                                 | yes – not toxic | purchased from Ted Pella Inc.                                                                                                                                 | --                  | ICP-MS | DLS (duration) | --     | growth assay, SEM                                                      | MIC/EC <sub>50</sub> , growth kinetics, AgNP-cell interaction                                                                                                | combined ion-particle |
| 19 | nitrifying sludge                                             | SWW                                                                              | 2 – 12            | sphere              | starch                                          | --              | purchased from Prime Nanotechnology Co, Ltd. (chemically synthesized from AgNO <sub>3</sub> using NaBH <sub>4</sub> and starch as reducing and capping agent) | --                  | --     | EDX            | UV-vis | SEM/TEM, ammonia oxidation, FISH, CLSM, live-dead Baclight assay,      | AgNP-cell interaction, physiology and morphology change, maximum ammonia oxidation rate, % inhibition ammonia oxidation, % abundance, % membrane compromised | ion-only              |
| 20 | <i>E. coli</i> DH5alpha DSMZ 6897, <i>S. aureus</i> DSMZ 1104 | Lysogeny broth medium and Roswell Park Memorial Institute medium/10 % FCS medium | 70 ± 20           | sphere              | PVP (-25)                                       | --              | reduced from AgNO <sub>3</sub> with glucose in the presence of PVP                                                                                            | ultracentrifugation | AAS    | DLS            | --     | MIC/MBC assay                                                          | MIC/MBC                                                                                                                                                      | ion-only              |
| 21 | <i>P. putida</i> mt-2 DSM 6125                                | mineral salt media with Na <sub>2</sub> -succinate                               | < 10 <sup>6</sup> | sphere <sub>e</sub> | Tetra-decane                                    | yes – not toxic | commercial AgNP dispersion (736503, Silverjet DGH-55LT-25C; Sigma-Aldrich)                                                                                    | --                  | --     | --             | --     | growth assay, surface hydrophobicity, analysis, fatty acid composition | growth inhibition, EC <sub>50</sub> , water contact angle, cis/trans ratio/membrane adaptive response                                                        | ion-only              |

|    |                                                                           |                                                                                                                                                                                         |            |        |                   |    |                                                                                                  |                                                                                                                                                                                        |                |                        |                                                            |                                                                                                                                             |                                                                                                                    |                       |
|----|---------------------------------------------------------------------------|-----------------------------------------------------------------------------------------------------------------------------------------------------------------------------------------|------------|--------|-------------------|----|--------------------------------------------------------------------------------------------------|----------------------------------------------------------------------------------------------------------------------------------------------------------------------------------------|----------------|------------------------|------------------------------------------------------------|---------------------------------------------------------------------------------------------------------------------------------------------|--------------------------------------------------------------------------------------------------------------------|-----------------------|
| 22 | Pi-Lac::GFP (propidium iodide stained <i>E. coli</i> ( <i>lac::GFP</i> )) | modified LB without NaCl supplemented with ampicillin                                                                                                                                   | 10         | sphere | --                | -- | manufactured by Sigma Aldrich Co. LLC                                                            | --                                                                                                                                                                                     | --             | UV-vis, TEM (duration) | --                                                         | dual fluorescence flow cytometric analysis, effects of divalent metal ions, plate counting                                                  | ratio of damaged to living cells, response ratio of metal ions                                                     | combined ion-particle |
|    |                                                                           |                                                                                                                                                                                         | 40         |        |                   |    |                                                                                                  |                                                                                                                                                                                        |                |                        |                                                            |                                                                                                                                             |                                                                                                                    |                       |
|    |                                                                           |                                                                                                                                                                                         | 100        |        |                   |    |                                                                                                  |                                                                                                                                                                                        |                |                        |                                                            |                                                                                                                                             |                                                                                                                    |                       |
| 23 | <i>E. coli</i> MG1655                                                     | NaHCO <sub>3</sub>                                                                                                                                                                      | 10.2 ± 2.3 | sphere | citrate (-47.4)   | -- | synthesized using sodium citrate and tannic acid                                                 | ultrafiltration (10 kDa MWCO membrane; Millipore) and washed twice with deionized water                                                                                                | --             | DLS (one time point)   | X-ray binding energy analysis for surface characterization | SEM, NAD <sup>+</sup> /NADH ratio test, intracellular ROS, malonyl-dialdehyde and 8-oxoguanine assay, Ag uptake and distribution evaluation | morphology, respiration chain disturbance, intracellular ROS production, lipid peroxidation, DNA damage, Ag uptake | combined ion-particle |
|    |                                                                           |                                                                                                                                                                                         | 10.2 ± 2.5 | sphere | MPA (-34.5)       | -- |                                                                                                  |                                                                                                                                                                                        |                |                        |                                                            |                                                                                                                                             |                                                                                                                    |                       |
|    |                                                                           |                                                                                                                                                                                         | 10.2 ± 2.2 | sphere | MHA (-29.1)       | -- | ligand exchange with citrate AgNPs                                                               |                                                                                                                                                                                        |                |                        |                                                            |                                                                                                                                             |                                                                                                                    |                       |
|    |                                                                           |                                                                                                                                                                                         | 9.9 ± 2    | sphere | MPS (-32.6)       | -- |                                                                                                  |                                                                                                                                                                                        |                |                        |                                                            |                                                                                                                                             |                                                                                                                    |                       |
| 24 | nitrifying bacteria ( <i>Nitrosomonas</i> and <i>Nitrobacter</i> )        | agricultural soil of Toccoa sandy loam amended with a buffered nutrient solution ((NH <sub>4</sub> ) <sub>3</sub> PO <sub>4</sub> and (NH <sub>4</sub> ) <sub>2</sub> SO <sub>4</sub> ) | 50         | sphere | --                | -- | purchased from Inframat Advanced Materials and Ultrasound Research Nanomaterials                 | --                                                                                                                                                                                     | --             | --                     | --                                                         | batch soil-slurry nitrification method, sorption isotherm                                                                                   | nitrification kinetics (V <sub>max</sub> nitrification potential), sorption                                        | combined ion-particle |
|    |                                                                           |                                                                                                                                                                                         | 15         |        | PVP               | -- | purchased from Ultrasound Research Nanomaterials and Nanostructured and Amorphous Materials Inc. |                                                                                                                                                                                        |                |                        |                                                            |                                                                                                                                             |                                                                                                                    |                       |
| 25 | <i>S. oneidensis</i> MR-1                                                 | ferric citrate bacterial growth medium (minimized chloride content)                                                                                                                     | 11 ± 3     | sphere | citrate (-29 ± 3) | -- | synthesized with trisodium citrate dihydrate and NaBH <sub>4</sub>                               | centrifuged at 1500 g for 4 min using regenerated cellulose (MWCO 50 kDa) centrifugal filter units (EMD Millipore), resuspended in DI water, centrifuge/resuspension steps repeated 3X | UV-vis, ICP-MS | DLS (duration)         | --                                                         | live/dead BacLight assay, TEM                                                                                                               | live/dead ratio, morphology/AgNP-cell interaction                                                                  | ion-only              |
| 26 | <i>P. putida</i> G7                                                       | phosphate buffer                                                                                                                                                                        | 50         | sphere | -49.2 ± 1.32      | -- | purchased from Sigma Aldrich                                                                     | --                                                                                                                                                                                     | --             | DLS (one time point)   | BET surface area, TEM for surface characterization         | ATP production (BacTiter-Glo) assay, computer-assisted motion analysis (phase                                                               | % viability, motility behavior, bacterial                                                                          | particle-only         |
|    |                                                                           |                                                                                                                                                                                         |            |        |                   |    |                                                                                                  |                                                                                                                                                                                        |                |                        |                                                            |                                                                                                                                             |                                                                                                                    |                       |

|    |                                                                            |                                                                                       |                                                       |                     |                                                 |                                                       |                                                                                                                                                                                                           |                                                                                                                                                                       |        |                                   |                                                                                                |                                                                                                            |                                                                                      |                       |
|----|----------------------------------------------------------------------------|---------------------------------------------------------------------------------------|-------------------------------------------------------|---------------------|-------------------------------------------------|-------------------------------------------------------|-----------------------------------------------------------------------------------------------------------------------------------------------------------------------------------------------------------|-----------------------------------------------------------------------------------------------------------------------------------------------------------------------|--------|-----------------------------------|------------------------------------------------------------------------------------------------|------------------------------------------------------------------------------------------------------------|--------------------------------------------------------------------------------------|-----------------------|
|    |                                                                            |                                                                                       |                                                       |                     |                                                 |                                                       |                                                                                                                                                                                                           |                                                                                                                                                                       |        |                                   |                                                                                                | contrast microscopy), chemical-in-pond method and inverted capillary assay                                 |                                                                                      |                       |
| 27 | <i>N. europaea</i> ATCC 19718                                              | HEPES buffer and (NH <sub>4</sub> ) <sub>2</sub> SO <sub>4</sub> minimal growth media | 20<br>80                                              | sphere              | phosphate monolayer                             | --                                                    | synthesized through aqueous reduction by NanoComposix, Inc                                                                                                                                                | --                                                                                                                                                                    | ICP-ES | time-resolved (TR)-DLS (duration) | --                                                                                             | nitrite production and inhibition reversal colorimetric assay, membrane stability, AMO- and HAO-SOUR assay | % nitrification activity, % intracellular K <sup>+</sup> , % SOUR activity           | ion-only              |
| 28 | <i>E. coli</i>                                                             | moderately hard water                                                                 | 10 ± 4.6<br>56 ± 14<br>72 ± 24                        | sphere              | BPEI (+28.8)<br>citrate (-20.08)<br>PVP (-7.49) | yes – not toxic<br>yes – not toxic<br>yes – not toxic | synthesized with AgNO <sub>3</sub> and HEPES and UV radiation<br>synthesized with AgNO <sub>3</sub> and sodium citrate dihydrate<br>bought from Nanostructured and Amorphous Materials Inc. and added PVP | tangential flow filtration system equipped with 10 kD hollow fiber polysulfone membranes; buffer exchange of impurities and ions in NP suspension with nanopure water | GF-AAS | DLS (before and after experiment) | UV-vis, PALS for zeta potential                                                                | <i>E. coli</i> bioassay                                                                                    | % inhibition of β-galactosidase enzyme, EC <sub>50</sub>                             | particle-only         |
| 29 | <i>E. coli</i> MC1061 (pSLlux), <i>E. coli</i> MC1061 (pSLcueR/pDNcopAlux) | water purified with MilliQ equipment                                                  | 83 ± 37<br>100 ± 40 (diameter) × 6100 ± 2700 (length) | sphere<br>nano-wire | citrate (-36)<br>-46                            | --<br>--                                              | purchased from MKNano as aqueous suspension<br>purchased from Seashell Technology as suspension in isopropanol                                                                                            | --                                                                                                                                                                    | GF-AAS | --                                | SEM-FIB-EDX for size and composition, DLS for HDD spheres, ELS for HDD for both shapes, UV-vis | bacterial bioluminescence assay, bacterial viability plate assay                                           | % inhibition of bioluminescence, fold induction of bioluminescence, EC <sub>50</sub> | ion-only              |
| 30 | Activated sludge                                                           | MLSS                                                                                  | 5<br>35                                               | sphere              | PEG<br>carbon                                   | --<br>--                                              | synthesized in another lab<br>purchased from Novaentrix Co.                                                                                                                                               | --                                                                                                                                                                    | --     | --                                | --                                                                                             | SEM, community population shift, qPCR/pyrosequencing                                                       | activated sludge microstructure, % relative abundance, copy number of AMO            | combined ion-particle |
| 31 | <i>E. coli</i> K12 TG1                                                     | distilled water, LB agar with ampicillin                                              | 52 <sup>b</sup>                                       | sphere              | --                                              | --                                                    | fabricated via reduction of AgNO <sub>3</sub> and hydroxylamine hydrochloride in NaOH solution                                                                                                            | --                                                                                                                                                                    | --     | --                                | --                                                                                             | luminescence assay, polarographic oxygen consumption method, AFM, cell                                     | Bioluminescence intensity (I), oxygen consumption rate, morphologic                  | ion-only              |

|    |                            |        |          |        |                                                                       |    |                                                                                                                  |                                                                                                   |                |                             |                                                           |                                             |                                               |                       |
|----|----------------------------|--------|----------|--------|-----------------------------------------------------------------------|----|------------------------------------------------------------------------------------------------------------------|---------------------------------------------------------------------------------------------------|----------------|-----------------------------|-----------------------------------------------------------|---------------------------------------------|-----------------------------------------------|-----------------------|
|    |                            |        |          |        |                                                                       |    |                                                                                                                  |                                                                                                   |                |                             |                                                           | viability serial dilution and plating assay | al changes, number of CFU, toxicity index (T) |                       |
| 32 | <i>E. coli</i> K12 MG 1655 | LB, MH | 24 ± 3.2 | sphere | PEGSH (-11.2 +/- 1.5), ligand density: 1.46 ± 0.17 nm <sup>-2</sup> ) | -- | synthesized by aqueous reduction with AgNO <sub>3</sub> , tannic acid, and citric acid. Ligand exchange to PEGSH | centrifuging and washing with DI water multiple times before and after ligand exchange with PEGSH | UV-vis, ICP-MS | TEM, DLS, UV-vis (duration) | NMR-TEM-ICP-MS for ligand density, XPS for AgCl formation | bacterial growth assay                      | OD <sub>600</sub>                             | combined ion-particle |

<sup>a</sup> Particle size determined by TEM/SEM

<sup>b</sup> DLS was used in place of TEM to determine particle size

<sup>c</sup> Particle size reported by manufacturer

<sup>d</sup> Included polygonal features (e.g., sharp corners)

<sup>e</sup> Assumed spherical shape

Abbreviations: AFM – atomic force microscopy; AMO – ammonia monooxygenase enzyme; AOB – ammonia oxidizing bacteria; ATP – adenosine triphosphate; BET – Brunauer-Emmett-Teller; BOD – biological oxygen demand; BPEI - branched poly(ethylene imine); CAPS – N-cyclohexyl-3-aminopropanesulfonic acid; CFU – colony forming unit; CLSM – confocal laser scanning microscopy; CPS – centrifugal particle sedimentation; DI – deionized water; DLS – dynamic light scattering; DNA – deoxyribonucleic acid; EC<sub>50</sub> – effective concentration that affects 50% of the test population; ELS – electrophoretic light scattering; EDS/EDX – energy-dispersive x-ray spectroscopy; FBS – fetal bovine serum; FCS – fetal calf serum; FIB – focused ion beam; FISH – fluorescence in situ hybridization; FTIR – Fourier-transform infrared spectroscopy; GA – gum arabic; GF-AAS – graphite furnace atomic absorption spectroscopy; HAO – hydroxylamine oxidoreductase enzyme; HDD – hydrodynamic diameter; HEPES – (4-(2-hydroxyethyl)-1-piperazineethanesulfonic acid); ICP-MS or OES – inductively coupled plasma mass spectrometry or optical emission spectroscopy; IC<sub>50</sub>; inhibitory concentration that inhibits 50% of the test population; ISB – Iso-Sensitest broth; LB – Luria-Bertani; MBC – minimum bactericidal concentration; ME – microbiocidal effect; MH – Mueller-Hinton; MHA - mercaptohexanoic acid; MIC – minimum inhibitory concentration; MLC – minimum lethal concentration; MLSS – mixed liquor suspended solids; MPA - mercaptopropionic acid; MPS – mercaptopropionic sulfonic acid; MTT – 3-(4,5-dimethylthiazol-2-yl)-2,5-diphenyltetrazolium bromidefor; MWCO – molecular weight cut-off; NMR – nuclear magnetic resonance; OD – optical density; PALS – phase analysis light scattering; PBS – phosphate buffered saline; PEG - poly(ethylene glycol); PEGSH - poly(ethylene glycol) methyl ether thiol; PVP – poly(vinylpyrrolidone); ROS – reactive oxygen species; (RT) or (q)PCR – real-time or quantitative polymerase chain reaction; SEM – scanning electron microscopy; SOUR – specific oxygen uptake rate; SWW – synthetic wastewater; TEM – transmission electron microscopy; TGA – thermogravimetric analysis; TSB – Tryptone Soya broth; UV-vis – ultraviolet-visible spectroscopy; XPS – x-ray photoelectron spectroscopy; XRD – x-ray diffraction

**Table S2.** Analysis of bulk ion release reported and theoretically calculated, determination of a scaled ion control, and the resulting conclusion from each study in the final subset.

| Refs | Method used to characterize dissolved Ag (filter and centrifugation settings) | Time point(s) measured (hr) | Solvent | Theoretical calculated percent Ag(I) release (%) | Reported = theoretically calculated dissolution? <sup>a</sup> | AgNP conc (mg/L) | Ag(I) ion conc (mg/L) | Form of Ag(I) ion | Assumed Ag(I) ion | mol/mL Ag as salt | mol/mL Ag as NP | Ratio of mol/mL Ag as salt:NP | Percent needing released to match ion | Scaled Ag(I) ion control present | Conclusion drawn |
|------|-------------------------------------------------------------------------------|-----------------------------|---------|--------------------------------------------------|---------------------------------------------------------------|------------------|-----------------------|-------------------|-------------------|-------------------|-----------------|-------------------------------|---------------------------------------|----------------------------------|------------------|
|------|-------------------------------------------------------------------------------|-----------------------------|---------|--------------------------------------------------|---------------------------------------------------------------|------------------|-----------------------|-------------------|-------------------|-------------------|-----------------|-------------------------------|---------------------------------------|----------------------------------|------------------|

|     |                                                                                                  |          |                     | (size (nm)) |              |      |      |                   |                              |          |          |         | control (%) |     |                                      |
|-----|--------------------------------------------------------------------------------------------------|----------|---------------------|-------------|--------------|------|------|-------------------|------------------------------|----------|----------|---------|-------------|-----|--------------------------------------|
| 3   | UV-vis                                                                                           | 0, 24    | DI water, LB        | 14.14 (9.1) | yes, full    | 1    | 1    | AgNO <sub>3</sub> | total Ag salt                | 5.89E-09 | 9.27E-09 | 16:25   | 64          | no  | particle-only, combined ion-particle |
|     |                                                                                                  |          |                     |             |              | 100  | 10   |                   |                              | 5.89E-08 | 9.27E-07 | 8:125   | 6           | yes |                                      |
|     |                                                                                                  |          |                     |             |              | 1    | 1    |                   |                              | 5.89E-09 | 9.27E-09 | 16:25   | 64          | no  |                                      |
|     |                                                                                                  |          |                     |             |              | 100  | 10   |                   |                              | 5.89E-08 | 9.27E-07 | 8:125   | 6           | yes |                                      |
|     |                                                                                                  |          |                     |             |              | 1    | 1    |                   |                              | 5.89E-09 | 9.27E-09 | 16:25   | 63.50       | no  |                                      |
|     |                                                                                                  |          |                     |             |              | 100  | 10   |                   |                              | 5.89E-08 | 9.27E-07 | 8:125   | 6.35        | yes |                                      |
|     |                                                                                                  |          |                     |             |              | 1    | 1    |                   |                              | 5.89E-09 | 9.27E-09 | 16:25   | 63.50       | no  |                                      |
|     |                                                                                                  |          |                     |             |              | 10   | 10   |                   |                              | 5.89E-08 | 9.27E-08 | 16:25   | 63.50       | no  |                                      |
|     |                                                                                                  |          |                     |             |              | 0.1  | 1    |                   |                              | 5.89E-09 | 9.27E-10 | 63:10   | 635.02      | no  |                                      |
|     |                                                                                                  |          |                     |             |              | 3    | 10   |                   |                              | 5.89E-08 | 2.78E-08 | 21:10   | 211.67      | no  |                                      |
|     |                                                                                                  |          |                     |             |              | 1.8  | 0.7  |                   |                              | 4.12E-09 | 1.67E-08 | 1:4     | 24.70       | yes |                                      |
|     |                                                                                                  |          |                     |             |              | 8    |      |                   |                              |          | 7.42E-08 | 55:1000 | 5.56        | yes |                                      |
|     |                                                                                                  |          |                     |             |              | 18.5 |      |                   |                              |          | 1.72E-07 | 3:125   | 2.40        | yes |                                      |
|     |                                                                                                  |          |                     |             |              | 3.8  |      |                   |                              |          | 3.52E-08 | 3:25    | 11.70       | yes |                                      |
| 1.4 | 1.30E-08                                                                                         | 8:25     | 31.75               | yes         |              |      |      |                   |                              |          |          |         |             |     |                                      |
| 4   | ICP-OES/MS (cellulose membrane MWCO 10 kDa using a Amicon stir cell (Millipore) pressurized with | 0.5, 240 | AgNP stock solution | 3.64 (35.4) | yes, partial | 0.75 | 0.05 | AgNO <sub>3</sub> | total Ag atom of the Ag salt | 4.64E-10 | 6.95E-9  | 7:100   | 6.67        | yes | ion-only, combined ion-particle      |
|     |                                                                                                  |          |                     |             |              |      |      |                   |                              |          |          |         |             |     |                                      |

|   |                                                                     |                            |                 |              |            |      |                          |                   |                              |          |          |          |      |     |                       |
|---|---------------------------------------------------------------------|----------------------------|-----------------|--------------|------------|------|--------------------------|-------------------|------------------------------|----------|----------|----------|------|-----|-----------------------|
|   | nitrogen)                                                           |                            |                 |              |            | 6.2  | 0.3                      |                   |                              |          |          |          | 4.84 | yes |                       |
| 5 | ICP-MS                                                              | 24, 48, 72, 96, 120        | --, pH = 4      | yes, partial | 33.65 (3)  | 9    | 0.005                    | AgNO <sub>3</sub> | total Ag atom of the Ag salt | 4.64E-11 | 8.34E-08 | 3:5,000  | 0.06 | yes | ion-only              |
|   |                                                                     |                            |                 |              |            | 210  | 0.3                      |                   |                              | 2.78E-09 | 1.95E-06 | 1:500    | 0.14 | yes |                       |
|   |                                                                     |                            |                 |              |            | 9    | 0.005                    |                   |                              | 4.64E-11 | 8.34E-08 | 3:5,000  | 0.06 | yes |                       |
|   |                                                                     |                            |                 |              |            | 210  | 0.3                      |                   |                              | 2.78E-09 | 1.95E-06 | 1:500    | 0.14 | yes |                       |
|   |                                                                     |                            |                 |              |            | 9    | 0.005                    |                   |                              | 4.64E-11 | 8.34E-08 | 3:5,000  | 0.06 | yes |                       |
|   |                                                                     |                            |                 |              |            | 210  | 0.3                      |                   |                              | 2.78E-09 | 1.95E-06 | 1:500    | 0.14 | yes |                       |
|   |                                                                     |                            |                 |              |            | 10   | 0.005                    |                   |                              | 4.64E-11 | 9.27E-08 | 5:10,000 | 0.05 | yes |                       |
|   |                                                                     |                            |                 |              |            | 70   | 0.3                      |                   |                              | 2.78E-09 | 6.49E-07 | 3:500    | 0.43 | yes |                       |
|   |                                                                     |                            |                 |              |            | 10   | 0.005                    |                   |                              | 4.64E-11 | 9.27E-08 | 5:10,000 | 0.05 | yes |                       |
|   |                                                                     |                            |                 |              |            | 70   | 0.3                      |                   |                              | 2.78E-09 | 6.49E-07 | 3:500    | 0.43 | yes |                       |
|   |                                                                     |                            |                 |              |            | 10   | 0.005                    |                   |                              | 4.64E-11 | 9.27E-08 | 5:10,000 | 0.05 | yes |                       |
|   |                                                                     |                            |                 |              |            | 70   | 0.3                      |                   |                              | 2.78E-09 | 6.49E-07 | 3:500    | 0.43 | yes |                       |
| 6 | ICP-MS (centrifuged at 50,000 g for 10 min at 4C (Beckman-Coulter)) | 0.5, 1, 2, 4, 6, 8, 12, 24 | LB lacking NaCl | yes, partial | 0.91 (142) | 200  | 0.4                      | AgNO <sub>3</sub> | total Ag atom of the Ag salt | 3.71E-09 | 1.85E-06 | 1:500    | 0.2  | yes | combined ion-particle |
|   |                                                                     |                            |                 |              |            | 100  | rate of AgNP ion release |                   |                              | --       | 9.27E-07 | --       | --   | yes |                       |
|   |                                                                     |                            |                 |              |            | 500  | 1                        |                   |                              | 9.27E-09 | 4.64E-06 | 1:500    | 0.2  | yes |                       |
|   |                                                                     |                            |                 |              |            | 500  | 6                        |                   |                              | 5.56E-08 | 4.64E-06 | 3:250    | 1.2  | yes |                       |
|   |                                                                     |                            |                 |              |            | 1000 | 16                       |                   |                              | 1.48E-07 | 9.27E-06 | 2:125    | 1.6  | yes |                       |
| 7 | --                                                                  | --                         | --              | --           | 0.91 (142) | 40   | 0.4                      | AgNO <sub>3</sub> | total Ag atom of the Ag salt | 3.71E-9  | 3.71E-7  | 1:100    | 1    | yes | combined ion-particle |

|    |                                                                                                                                            |              |                                               |             |              |       |       |                   |                              |          |          |        |       |     |                       |
|----|--------------------------------------------------------------------------------------------------------------------------------------------|--------------|-----------------------------------------------|-------------|--------------|-------|-------|-------------------|------------------------------|----------|----------|--------|-------|-----|-----------------------|
| 8  | ICP-OES (Dialysis Tubing Benzoylated of nominal MWCO 2 kDa)                                                                                | 24           | ISB                                           | 18.39 (7)   | no           | 180   | 15    | AgNO <sub>3</sub> | total Ag salt                | 8.83E-08 | 1.67E-06 | 5:100  | 5.29  | yes | particle-only         |
|    |                                                                                                                                            |              |                                               |             |              | 15    | 10    |                   |                              | 5.89E-08 | 1.39E-07 | 2:5    | 42.33 | no  |                       |
| 9  | ICP-MS (dialysis cartridge float-analyzer G2 (Spectra/Por, Spectrum Laboratories, USA))                                                    | 24, 48, 72   | artificial sea-water and fresh-water          | 5.96 (20)   | yes, full    | 0.005 | 0.02  | AgNO <sub>3</sub> | total Ag atom of the Ag salt | 2E-10    | 5E-11    | 4:1    | 400   | no  | combined ion-particle |
|    |                                                                                                                                            |              |                                               | 3.3 (40)    |              | 2     | 0.5   |                   |                              | 5E-9     | 2E-08    | 1:4    | 25    | yes |                       |
|    |                                                                                                                                            |              |                                               | 1.32 (100)  |              | 0.005 | 0.02  |                   |                              | 2E-10    | 5E-11    | 4:1    | 400   | no  |                       |
|    |                                                                                                                                            |              |                                               | 5.96 (20)   |              | 2     | 0.5   |                   |                              | 5E-9     | 2E-08    | 1:4    | 25    | yes |                       |
|    |                                                                                                                                            |              |                                               | 3.3 (40)    |              | 0.005 | 0.02  |                   |                              | 2E-10    | 5E-11    | 4:1    | 400   | no  |                       |
|    |                                                                                                                                            |              |                                               | 1.32 (100)  |              | 2     | 0.5   |                   |                              | 5E-9     | 2E-08    | 1:4    | 25    | yes |                       |
|    |                                                                                                                                            |              |                                               | 5.96 (20)   |              | 0.36  | 0.01  |                   |                              | 1E-10    | 3.30E-09 | 1:33   | 3.03  | yes |                       |
|    |                                                                                                                                            |              |                                               | 3.3 (40)    |              | 1     | 0.2   |                   |                              | 2E-9     | 1E-08    | 1:5    | 20    | yes |                       |
|    |                                                                                                                                            |              |                                               | 1.32 (100)  |              | 0.36  | 0.01  |                   |                              | 1E-10    | 3.30E-09 | 1:33   | 3.03  | yes |                       |
|    |                                                                                                                                            |              |                                               |             |              | 1     | 0.2   |                   |                              | 2E-9     | 1E-08    | 1:5    | 20    | yes |                       |
|    |                                                                                                                                            |              |                                               |             |              | 0.36  | 0.01  |                   |                              | 1E-10    | 3.30E-09 | 1:33   | 3.03  | yes |                       |
|    |                                                                                                                                            |              |                                               |             |              | 1     | 0.2   |                   |                              | 2E-9     | 1E-08    | 1:5    | 20    | no  |                       |
| 10 | ICP-MS (Amicon Ultra-4 Centrifugal Filter Unit 7,000 rpm 35 min, <3 kDa pore size)                                                         | 0, 24        | AOB media                                     | 5.11 (25.2) | no           | 0.2   | 0.2   | AgNO <sub>3</sub> | total Ag atom of the Ag salt | 1.85E-09 | 1.85E-09 | 1:1    | 100   | no  | ion-only              |
|    |                                                                                                                                            |              |                                               | 4.77 (27)   |              | 2     | 2     |                   |                              | 1.85E-08 | 1.85E-08 | 1:1    | 100   | no  |                       |
|    |                                                                                                                                            |              |                                               | 6.13 (21)   |              | 20    | 0.2   |                   |                              | 1.85E-09 | 1.85E-08 | 1:10   | 10    | yes |                       |
|    |                                                                                                                                            |              |                                               |             |              |       |       |                   |                              | 1.85E-09 | 1.85E-07 | 1:100  | 1     | yes |                       |
| 11 | AAS, Orion 013010MD conductivity cell, ultrafiltration membrane 10 kDa polyethersulfone (MidiKros Hollow Fiber Module (P-X3-010E-300-02N)) | over 3 weeks | purified AgNP stock solution, BOD5 test media | 2.22 (58)   | yes, partial | 0.003 | 0.003 | AgNO <sub>3</sub> | total Ag atom of the Ag salt | 2.78E-11 | 2.78E-11 | 1:1    | 100   | no  | particle-only         |
|    |                                                                                                                                            |              |                                               | 6.77 (19)   |              | 0.3   | 0.070 |                   |                              | 6.49E-10 | 2.78E-09 | 23:100 | 23.33 | yes |                       |
|    |                                                                                                                                            |              |                                               | 10.73 (12)  |              | 0.3   | 0.003 |                   |                              | 2.78E-11 | 2.78E-11 | 1:1    | 100   | no  |                       |
|    |                                                                                                                                            |              |                                               |             |              | 1     | 0.070 |                   |                              | 6.49E-10 | 9.27E-09 | 7:100  | 7     | yes |                       |
|    |                                                                                                                                            |              |                                               |             |              | 0.003 | 0.003 |                   |                              | 2.78E-11 | 2.78E-11 | 1:1    | 100   | no  |                       |



|     |                                                                                                                |                    |                                                |              |              |       |        |                   |               |          |          |           |       |     |                       |
|-----|----------------------------------------------------------------------------------------------------------------|--------------------|------------------------------------------------|--------------|--------------|-------|--------|-------------------|---------------|----------|----------|-----------|-------|-----|-----------------------|
|     |                                                                                                                |                    |                                                |              |              | 0.3   | 0.070  |                   |               | 6.49E-10 | 2.78E-09 | 23:100    | 23.33 | yes |                       |
|     |                                                                                                                |                    |                                                | 12.87 (10)   |              | 0.003 | 0.003  |                   |               | 2.78E-11 | 2.78E-11 | 1:1       | 100   | no  |                       |
|     |                                                                                                                |                    |                                                |              |              | 0.3   | 0.070  |                   |               | 6.49E-10 | 2.78E-09 | 23:100    | 23.33 | yes |                       |
| 12  | --                                                                                                             | --                 | --                                             | 6.34 (20.3)  |              | 5     | 0.25   | AgNO <sub>3</sub> | total Ag salt | 1.47E-09 | 4.64E-08 | 3:100     | 3.18  | yes | ion-only              |
|     |                                                                                                                |                    |                                                |              |              | 50    | 2      |                   |               | 1.18E-08 | 4.64E-07 | 1:40      | 2.54  | yes |                       |
|     |                                                                                                                |                    |                                                | 2.42 (53.1)  | --           | 10    | 0.25   |                   |               | 1.47E-09 | 9.27E-08 | 2:125     | 1.59  | yes |                       |
|     |                                                                                                                |                    |                                                |              |              | 100   | 2      |                   |               | 1.18E-08 | 9.27E-07 | 3:250     | 1.27  | yes |                       |
|     |                                                                                                                |                    |                                                | 1.14 (112.6) |              | 50    | 0.25   |                   |               | 1.47E-09 | 4.64E-07 | 3:1000    | 0.32  | yes |                       |
|     |                                                                                                                |                    |                                                |              |              | 220   | 2      |                   |               | 1.18E-08 | 2.04E-06 | 6:1000    | 0.58  | yes |                       |
| 13  | ICP-MS, 40 min at 4000 g using centrifugal filter devices (Amicon ultra-4, Millipore, Ireland) with 3 kDa MWCO | 0.5, 6, 24, 48, 72 | 2% NaCl, NBBM, Volvic water                    | 6.44 (20)    | yes, partial | 0.1   | 0.05   | AgNO <sub>3</sub> | total Ag salt | 2.94E-10 | 9.27E-10 | 8:25      | 31.75 | yes | combined ion-particle |
|     |                                                                                                                |                    |                                                | 0.64 (200)   |              | 300   | 7      |                   |               | 4.12E-08 | 2.78E-06 | 15:1000   | 1.48  | yes |                       |
|     |                                                                                                                |                    |                                                | 5.60 (23)    |              | 0.05  | 0.05   |                   |               | 2.94E-10 | 4.64E-10 | 63:100    | 63.50 | no  |                       |
|     |                                                                                                                |                    |                                                | 4.77 (27)    |              | 100   | 7      |                   |               | 4.12E-08 | 9.27E-07 | 2:45      | 4.45  | yes |                       |
| 14b | bioluminescence                                                                                                | 0.5, 2             | 0.9% NaCl                                      | 1.29 (100)   | no           | 0.01  | 0.01   | AgNO <sub>3</sub> | total Ag salt | 5.89E-11 | 9.27E-11 | 63:100    | 63.50 | no  | combined ion-particle |
|     |                                                                                                                |                    |                                                |              |              | 1000  | 10     |                   |               | 5.89E-08 | 9.27E-06 | 63:10,000 | 0.64  | yes |                       |
|     |                                                                                                                |                    |                                                |              |              | 0.001 | 0.0002 |                   |               | 1.18E-12 | 9.27E-12 | 13:100    | 12.70 | yes |                       |
|     |                                                                                                                |                    |                                                |              |              | 3     | 0.2    |                   |               | 1.18E-09 | 2.78E-08 | 21:500    | 4.23  | yes |                       |
| 15  | Single particle (SP)-ICP-MS and GF-AAS (ultracentrifugation at 390,000 g for 30 min (Beckman-Coulter           | 4, 24, 48, 72      | Ultra-pure water, artificial freshwater, algal | 11.1 (11.6)  | yes, partial | 0.01  | 0.0001 | AgNO <sub>3</sub> | total Ag salt | 5.89E-13 | 9.27E-11 | 4:625     | 0.64  | yes | combined ion-particle |
|     |                                                                                                                |                    |                                                |              |              | 10    | 0.04   |                   |               | 2.35E-10 | 9.27E-08 | 25:10,000 | 0.25  | yes |                       |
|     |                                                                                                                |                    |                                                | 7.23 (17.8)  |              | 0.01  | 0.0001 |                   |               | 5.89E-13 | 9.27E-11 | 4:625     | 0.64  | yes |                       |

|    |                                                                                                                       |           |                                           |             |           |       |        |                   |                              |          |          |           |          |          |                       |          |       |     |
|----|-----------------------------------------------------------------------------------------------------------------------|-----------|-------------------------------------------|-------------|-----------|-------|--------|-------------------|------------------------------|----------|----------|-----------|----------|----------|-----------------------|----------|-------|-----|
|    | ultracentrifuge L8-55 M))                                                                                             |           | media, cell culture media                 |             |           | 10    | 0.04   |                   |                              | 2.35E-10 | 9.27E-08 | 25:10,000 | 0.25     | yes      |                       |          |       |     |
|    |                                                                                                                       |           |                                           |             |           | 0.01  | 0.0001 |                   |                              | 5.89E-13 | 9.27E-11 | 4:625     | 0.64     | yes      |                       |          |       |     |
|    |                                                                                                                       |           |                                           |             |           | 10    | 0.04   |                   |                              | 2.35E-10 | 9.27E-08 | 25:10,000 | 0.25     | yes      |                       |          |       |     |
|    |                                                                                                                       |           |                                           |             |           | 0.01  | 0.0001 |                   |                              | 5.89E-13 | 9.27E-11 | 4:625     | 0.64     | yes      |                       |          |       |     |
|    |                                                                                                                       |           |                                           |             |           | 10    | 0.04   |                   |                              | 2.35E-10 | 9.27E-08 | 25:10,000 | 0.25     | yes      |                       |          |       |     |
|    |                                                                                                                       |           |                                           |             |           | 0.01  | 0.0001 |                   |                              | 5.89E-13 | 9.27E-11 | 4:625     | 0.64     | yes      |                       |          |       |     |
|    |                                                                                                                       |           |                                           |             |           | 10    | 0.04   |                   |                              | 2.35E-10 | 9.27E-08 | 25:10,000 | 0.25     | yes      |                       |          |       |     |
| 16 | --                                                                                                                    | --        | --                                        | 15.51 (8.3) | --        | 0.125 | 0.0625 | AgNO <sub>3</sub> | total Ag atom of the Ag salt | 5.79E-10 | 1.16E-09 | 1:2       | 50       | no       | combined ion-particle |          |       |     |
|    |                                                                                                                       |           |                                           |             |           | 64    | 2      |                   |                              | 1.85E-08 | 5.93E-07 | 3:100     | 3.13     | yes      |                       |          |       |     |
| 17 | conductivity                                                                                                          | --        | --                                        | 21.45 (6)   | --        | 37.5  | 3.75   | AgNO <sub>3</sub> | total Ag salt                | 2.21E-08 | 3.48E-07 | 3:50      | 6.35     | yes      | ion-only              |          |       |     |
|    |                                                                                                                       |           |                                           |             |           | 375   | 37.5   |                   |                              | 2.21E-07 | 3.48E-06 | 3:50      | 6.35     | yes      |                       |          |       |     |
|    |                                                                                                                       |           |                                           |             |           | 3750  | 375    |                   |                              | 2.21E-06 | 3.48E-05 | 3:50      | 6.35     | Yes      |                       |          |       |     |
| 18 | ICP-MS, filtered through a 0.025-µm polyethersulfone membrane (Millipore, Billerica, MA, USA) and digested for 24 hrs | 48-168    | DI water, LB, PNS+RE                      | 2.87 (44.9) | yes, full | 0.1   | 0.1    | AgNO <sub>3</sub> | total Ag salt                | 5.89E-10 | 9.27E-10 | 3:5       | 63.50    | no       | combined ion-particle |          |       |     |
|    |                                                                                                                       |           |                                           |             |           | 1     |        |                   |                              |          |          |           |          | 9.27E-09 |                       | 3:50     | 6.35  | yes |
|    |                                                                                                                       |           |                                           |             |           | 5     |        |                   |                              |          |          |           | 4.64E-08 | 1:80     |                       | 1.27     | yes   |     |
|    |                                                                                                                       |           |                                           |             |           | 0.1   | 1      |                   |                              |          |          | 5.89E-09  | 9.27E-10 | 635:100  |                       | 635.02   | no    |     |
|    |                                                                                                                       |           |                                           |             |           | 1     |        |                   |                              |          |          |           |          | 9.27E-09 |                       | 635:1000 | 63.50 | no  |
|    |                                                                                                                       |           |                                           |             |           | 5     |        |                   |                              |          |          |           |          | 4.64E-08 |                       | 127:1000 | 12.70 | yes |
| 19 | AAS, ultracentrifuge machine (Optima™ MAX-XP Ultracentrifuge, Beckman Coulter, Inc., USA) and                         | 0, 30, 60 | inorganic SWW, SWW with nitrifying sludge | 18.39 (7)   | no        | 1     | 0.05   | AgNO <sub>3</sub> | total Ag atom of the Ag salt | 4.64E-10 | 9.27E-09 | 1:20      | 5        | yes      | ion-only              |          |       |     |

|    |                                                                                                    |                     |                                 |            |              |      |       |                                                 |                              |          |          |        |      |     |                       |
|----|----------------------------------------------------------------------------------------------------|---------------------|---------------------------------|------------|--------------|------|-------|-------------------------------------------------|------------------------------|----------|----------|--------|------|-----|-----------------------|
|    | centrifuged at 165000×g, 4 °C, for 2 h using MLN-80 rotor (16 × 58 mm, Beckman Coulter, Inc., USA) |                     |                                 |            |              | 10   | 0.10  |                                                 |                              | 9.27E-10 | 9.27E-08 | 1:100  | 1    | yes |                       |
|    |                                                                                                    |                     |                                 |            |              | 100  | 0.50  |                                                 |                              | 4.64E-09 | 9.27E-07 | 1:200  | 0.5  | yes |                       |
|    |                                                                                                    |                     |                                 |            |              | 100  | 5     |                                                 |                              | 4.64E-08 | 9.27E-07 | 1:20   | 5    | yes |                       |
| 20 | --                                                                                                 | --                  | --                              | 1.84 (70)  | --           | 12.5 | 1     | Ag-C <sub>2</sub> H <sub>3</sub> O <sub>2</sub> | total Ag atom of the Ag salt | 9.27E-09 | 1.16E-07 | 1:11   | 8    | yes | ion-only              |
|    |                                                                                                    |                     |                                 |            |              | 50   | 10    |                                                 |                              | 9.27E-08 | 4.64E-07 | 1:5    | 20   | yes |                       |
| 21 | --                                                                                                 | --                  | --                              | 12.87 (10) | no           | 200  | 0.05  | AgNO <sub>3</sub>                               | total Ag salt                | 2.94E-10 | 1.85E-06 | 1:6300 | 0.02 | Yes | ion-only              |
|    |                                                                                                    |                     |                                 |            |              | 900  | 0.3   |                                                 |                              | 1.77E-09 | 8.34E-06 | 1:4700 | 0.02 | Yes |                       |
| 22 | UV-vis/ICP-MS                                                                                      | --                  | LB lacking NaCl with ampicillin | 12.87 (10) | yes, full    | 0.2  | --    | --                                              | total Ag atom of the Ag salt | --       | --       | --     | --   | --  | combined ion-particle |
|    |                                                                                                    |                     |                                 | 3.22 (40)  |              | 0.4  | 0.04  |                                                 |                              | 3.71E-10 | 3.71E-09 | 1:10   | 10   | yes |                       |
|    |                                                                                                    |                     |                                 | 1.29 (100) |              | 0.6  | --    |                                                 |                              | --       | --       | --     | --   | --  |                       |
| 23 | ICP-MS, ultrafiltration with 3kDa MWCO membrane Millipore                                          | 6, 24               | NaHCO <sub>3</sub>              | 12.87 (10) | no           | 1    | 0.005 | AgNO <sub>3</sub>                               | total Ag atom of the Ag salt | 4.64E-11 | 9.27E-09 | 1:200  | 0.5  | yes | combined ion-particle |
|    |                                                                                                    |                     |                                 |            |              | 5    | 0.02  |                                                 |                              | 1.85E-10 | 4.64E-08 | 1:250  | 0.4  | yes |                       |
|    |                                                                                                    |                     |                                 |            |              | 5    | 0.05  |                                                 |                              | 4.64E-10 | 4.64E-08 | 1:100  | 1    | yes |                       |
|    |                                                                                                    |                     |                                 |            |              | 15   | 0.2   |                                                 |                              | 1.85E-09 | 1.39E-07 | 2:150  | 1.33 | yes |                       |
|    |                                                                                                    |                     |                                 |            |              | 15   | 0.5   |                                                 |                              | 4.64E-09 | 1.39E-07 | 1:30   | 3.33 | yes |                       |
|    |                                                                                                    |                     |                                 |            |              | 15   | 1     |                                                 |                              | 9.27E-09 | 1.39E-07 | 1:15   | 6.67 | yes |                       |
| 24 | ICP-AES; filtered by centrifugation using microfilter                                              | 24, 48, 72, 96, 120 | buffered nutrient solution      | 2.57 (50)  | yes, partial | 1    | 1     | Ag <sub>2</sub> SO <sub>4</sub>                 | total Ag atom of the Ag salt | 9.27E-09 | 9.27E-09 | 1:1    | 100  | no  | combined ion-particle |
|    |                                                                                                    |                     |                                 |            |              | 300  | 10    |                                                 |                              | 9.27E-08 | 2.78E-06 | 1:30   | 3.33 | yes |                       |

|    |                                                                                                                        |         |          |            |           |       |          |                   |                              |          |          |       |       |     |               |
|----|------------------------------------------------------------------------------------------------------------------------|---------|----------|------------|-----------|-------|----------|-------------------|------------------------------|----------|----------|-------|-------|-----|---------------|
|    | centrifuge tubes (washed with copper nitrate) at 3,750 g for 20 minutes                                                |         |          | 8.58 (15)  |           | 50    | 5        |                   |                              | 4.64E-08 | 4.64E-07 | 1:10  | 10    | yes |               |
|    |                                                                                                                        |         |          |            |           | 100   | 10       |                   |                              | 9.27E-08 | 9.27E-07 | 1:10  | 10    | yes |               |
|    |                                                                                                                        |         |          |            |           | 1     | 1        |                   |                              | 9.27E-09 | 9.27E-09 | 1:1   | 100   | no  |               |
|    |                                                                                                                        |         |          |            |           | 10    | 10       |                   |                              | 9.27E-08 | 9.27E-08 | 1:1   | 100   | no  |               |
|    |                                                                                                                        |         |          |            |           | 50    | 5        |                   |                              | 4.64E-08 | 4.64E-07 | 1:10  | 10    | yes |               |
|    |                                                                                                                        |         |          |            |           | 100   | 10       |                   |                              | 9.27E-08 | 9.27E-07 | 1:10  | 10    | yes |               |
|    |                                                                                                                        |         |          |            |           |       |          |                   |                              |          |          |       |       |     |               |
| 25 | Ag+ selective electrodes with ionophore-doped fluororous sensing membrane, ICP-MS, in presence and absence of bacteria | over 24 | DI water | 11.70 (11) | yes, full | 3     | 0.3      | --                | total Ag atom of the Ag salt | 3.00E-09 | 2.78E-08 | 1:9   | 10.79 | yes | ion-only      |
|    |                                                                                                                        |         |          |            |           | 0.3   | 0.1      |                   |                              | 1.00E-09 | 2.78E-09 | 4:11  | 35.96 | yes |               |
|    |                                                                                                                        |         |          |            |           | 15    | 1        |                   |                              | 1.00E-08 | 1.39E-07 | 7:100 | 7.19  | yes |               |
| 26 | --                                                                                                                     | --      | --       | 2.57 (50)  | --        | 0.2   | 0.001    | AgNO <sub>3</sub> | total Ag salt                | 5.89E-12 | 1.85E-09 | 1:300 | 0.32  | yes | particle-only |
|    |                                                                                                                        |         |          |            |           | 0.2   | 0.01     |                   |                              | 5.89E-11 | 1.85E-09 | 1:30  | 3.18  | yes |               |
|    |                                                                                                                        |         |          |            |           | 0.2   | 0.1      |                   |                              | 5.89E-10 | 1.85E-09 | 1:3   | 31.75 | yes |               |
|    |                                                                                                                        |         |          |            |           | 0.1   | 0.1      |                   |                              | 5.89E-10 | 9.27E-10 | 5:8   | 63.50 | no  |               |
|    |                                                                                                                        |         |          |            |           | 1     | 1        |                   |                              | 5.89E-9  | 9.27E-9  | 5:8   | 63.50 | no  |               |
|    |                                                                                                                        |         |          |            |           | 100   | 100      |                   |                              | 5.89E-07 | 9.27E-07 | 5:8   | 63.50 | no  |               |
|    |                                                                                                                        |         |          | 0.2        |           | 0.001 | 5.89E-12 |                   |                              | 1.85E-09 | 1:300    | 0.32  | yes   |     |               |
|    |                                                                                                                        |         |          | 0.2        |           | 0.01  | 5.89E-11 |                   |                              | 1.85E-09 | 1:30     | 3.18  | yes   |     |               |
|    |                                                                                                                        |         |          | 0.2        |           | 0.1   | 5.89E-10 |                   |                              | 1.85E-09 | 1:3      | 31.75 | yes   |     |               |
|    |                                                                                                                        |         |          | 0.1        |           | 0.1   | 5.89E-10 |                   |                              | 9.27E-10 | 5:8      | 63.50 | no    |     |               |
|    |                                                                                                                        |         |          |            |           |       |          |                   |                              |          |          |       |       |     |               |

|    |                                                                                                                               |    |                             |                         |              |      |        |                   |                              |          |          |       |        |     |                       |
|----|-------------------------------------------------------------------------------------------------------------------------------|----|-----------------------------|-------------------------|--------------|------|--------|-------------------|------------------------------|----------|----------|-------|--------|-----|-----------------------|
|    |                                                                                                                               |    |                             |                         |              |      |        |                   |                              | 10       | 10       |       |        |     |                       |
|    |                                                                                                                               |    |                             |                         |              | 1    | 1      |                   |                              | 5.89E-9  | 9.27E-9  | 5:8   | 63.50  | no  |                       |
|    |                                                                                                                               |    |                             |                         |              | 100  | 100    |                   |                              | 5.89E-07 | 9.27E-07 | 5:8   | 63.50  | no  |                       |
| 27 | ICP-ES, centrifugal ultra-filtration device with 5 kDa MWCO (Amicon Ultra-15, Millipore Co., Billericka, MA), 30 min at 5000g | 3  | HEPES buffer, minimal media | 6.44 (20)               | yes, partial | 0.30 | 0.05   | AgNO <sub>3</sub> | total Ag atom of the Ag salt | 4.64E-10 | 2.78E-09 | 1:6   | 16.67  | yes | ion-only              |
|    |                                                                                                                               |    |                             |                         |              | 0.75 | 0.05   |                   |                              | 4.64E-10 | 6.95E-09 | 2:30  | 6.67   | yes |                       |
|    |                                                                                                                               |    |                             |                         |              | 0.75 | 1.25   |                   |                              | 1.16E-08 | 6.95E-09 | 83:50 | 166.67 | no  |                       |
|    |                                                                                                                               |    |                             |                         |              | 10   | 1      |                   |                              | 9.27E-09 | 9.27E-08 | 1:10  | 10     | yes |                       |
|    |                                                                                                                               |    |                             | 1.61 (80)               |              | 2.75 | 0.2    |                   |                              | 1.85E-09 | 2.55E-08 | 1:14  | 7.27   | yes |                       |
| 28 | GF-AAS, centrifuged for 30 min at ~3150 g (4000 rpm, Thermo Electron, IEC Centra CL3 Series Centrifuge)                       | 48 | --                          | 12.87 (10)              | yes, full    | 0.01 | 0.04   | AgNO <sub>3</sub> | total Ag atom of the Ag salt | 3.71E-10 | 9.27E-11 | 4:1   | 400    | no  | particle-only         |
|    |                                                                                                                               |    |                             |                         |              | 8.7  | 3.62   |                   |                              | 3.36E-08 | 8.07E-08 | 2:5   | 41.61  | no  |                       |
|    |                                                                                                                               |    |                             | 2.3 (56)                |              | 0.02 | 0.04   |                   |                              | 3.71E-10 | 1.85E-10 | 2:1   | 200    | no  |                       |
|    |                                                                                                                               |    |                             |                         |              | 13.2 | 3.62   |                   |                              | 3.36E-08 | 1.22E-07 | 7:27  | 27.42  | yes |                       |
|    |                                                                                                                               |    |                             | 1.79 (72)               |              | 0.05 | 0.04   |                   |                              | 3.71E-10 | 4.64E-10 | 4:5   | 80     | no  |                       |
|    |                                                                                                                               |    |                             |                         |              | 41.2 | 3.62   |                   |                              | 3.36E-08 | 3.82E-07 | 9:100 | 8.79   | yes |                       |
| 29 | AAS or Ag-sensor bacteria, ultracentrifuged at 390 000 g for 45 minutes                                                       | 4  | --                          | 1.55 (83, sphere)       | yes, partial | 0.01 | 0.0003 | AgNO <sub>3</sub> | total Ag atom of the Ag salt | 2.78E-12 | 9.27E-11 | 3:100 | 3      | yes | ion-only              |
|    |                                                                                                                               |    |                             |                         |              | 30   | 0.5    |                   |                              | 4.64E-09 | 2.78E-07 | 2:125 | 1.67   | yes |                       |
|    |                                                                                                                               |    |                             | 0.82 (100 X 6100, wire) |              | 0.01 | 0.0003 |                   |                              | 2.78E-12 | 9.27E-11 | 3:100 | 3      | yes |                       |
|    |                                                                                                                               |    |                             |                         |              | 30   | 0.5    |                   |                              | 4.64E-09 | 2.78E-07 | 2:125 | 1.67   | yes |                       |
| 30 | ICP-MS, ultracentrifugation at 35,000 rpm for 4 hr                                                                            | -- | --                          | 25.74 (5)               | --           | 0.05 | 1      | AgNO <sub>3</sub> | total Ag atom of the Ag salt | 9.27E-09 | 4.64E-10 | 20:1  | 2000   | no  | combined ion-particle |

|    |                                             |                                           |        |              |           |     |                          |                   |                              |          |          |           |       |     |                       |
|----|---------------------------------------------|-------------------------------------------|--------|--------------|-----------|-----|--------------------------|-------------------|------------------------------|----------|----------|-----------|-------|-----|-----------------------|
|    |                                             |                                           |        | 3.68<br>(35) |           | 40  | 1                        |                   |                              | 9.27E-09 | 3.71E-07 | 1:40      | 2.5   | yes |                       |
| 31 | --                                          | --                                        | --     | 2.48<br>(52) | --        | 3.4 | 0.005                    | AgNO <sub>3</sub> | total Ag salt                | 2.94E-11 | 3.15E-08 | 9:10,000  | 0.09  | Yes | ion-only              |
|    |                                             |                                           |        |              |           | 34  | 0.1                      |                   |                              | 5.89E-10 | 3.15E-07 | 19:10,000 | 0.19  | Yes |                       |
|    |                                             |                                           |        |              |           | 8.5 | 0.02                     |                   |                              | 1.18E-10 | 7.88E-08 | 15:10,000 | 0.15  | Yes |                       |
|    |                                             |                                           |        |              |           | 44  | 11                       |                   |                              | 6.48E-08 | 4.08E-07 | 8:50      | 15.88 | Yes |                       |
|    |                                             |                                           |        |              |           | 22  | 0.22                     |                   |                              | 1.30E-09 | 2.04E-07 | 63:10,000 | 0.64  | Yes |                       |
| 32 | ICP-MS, centrifuged at 20000 rcf for 20 min | 0, 2, 4, 6, 8, 10, 12, 14, 16, 18, 20, 24 | LB, MH | 5.36<br>(24) | yes, full | 6.7 | rate of AgNP ion release | AgNO <sub>3</sub> | total Ag atom of the Ag salt | --       | 6.21E-08 | --        | --    | yes | combined ion-particle |

<sup>a</sup> Full = entire range of theoretical values is within the reported measured concentration range of Ag(I) ions, partial = only a portion of the range of theoretical values is within the reported measured concentration range of Ag(I) ions, no = there is no overlap in the range of theoretical values and the reported measured concentration range of Ag(I) ions (see Figure S2).

<sup>b</sup> Intracellular dissolution was used in place of bulk dissolution since it was the only value reported.

Abbreviations: AOB – ammonia oxidizing bacteria; BOD – biological oxygen demand; DI – deionized water; GF-AAS – graphite furnace atomic absorption spectroscopy; HEPES – (4-(2-hydroxyethyl)-1-piperazineethanesulfonic acid); ICP-MS or OES or AES – inductively coupled plasma mass spectrometry or optical or atomic emission spectroscopy; LB – Luria-Bertani; MH – Mueller-Hinton; MWCO – molecular weight cut-off; NBBM – Bold's Basal Medium enriched with nitrate; PEGSH - poly(ethylene glycol) methyl ether thiol; PNE+RE – Plant nutrient solution containing *Z. mays* root excretion; SWW – synthetic wastewater; UV-vis – ultraviolet-visible spectroscopy

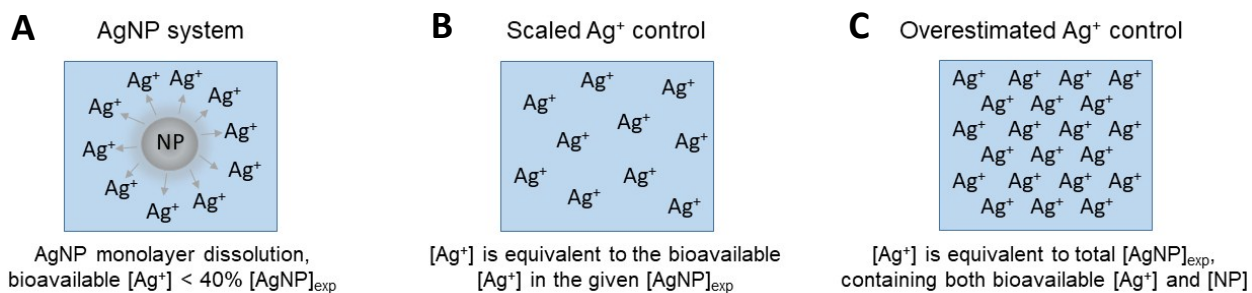

**Figure S1.** Schematic demonstrating the difference between an appropriate and inappropriate ion control. (A) The AgNP system contains the zero-valent NP and dissolved Ag(I) ions. (B) An appropriate ion control contains dissolved silver at an equivalent concentration to the Ag(I) ions released from the AgNP. (C) A concentration of dissolved silver equivalent to the total silver present in the AgNP would not serve as an appropriate ion control.

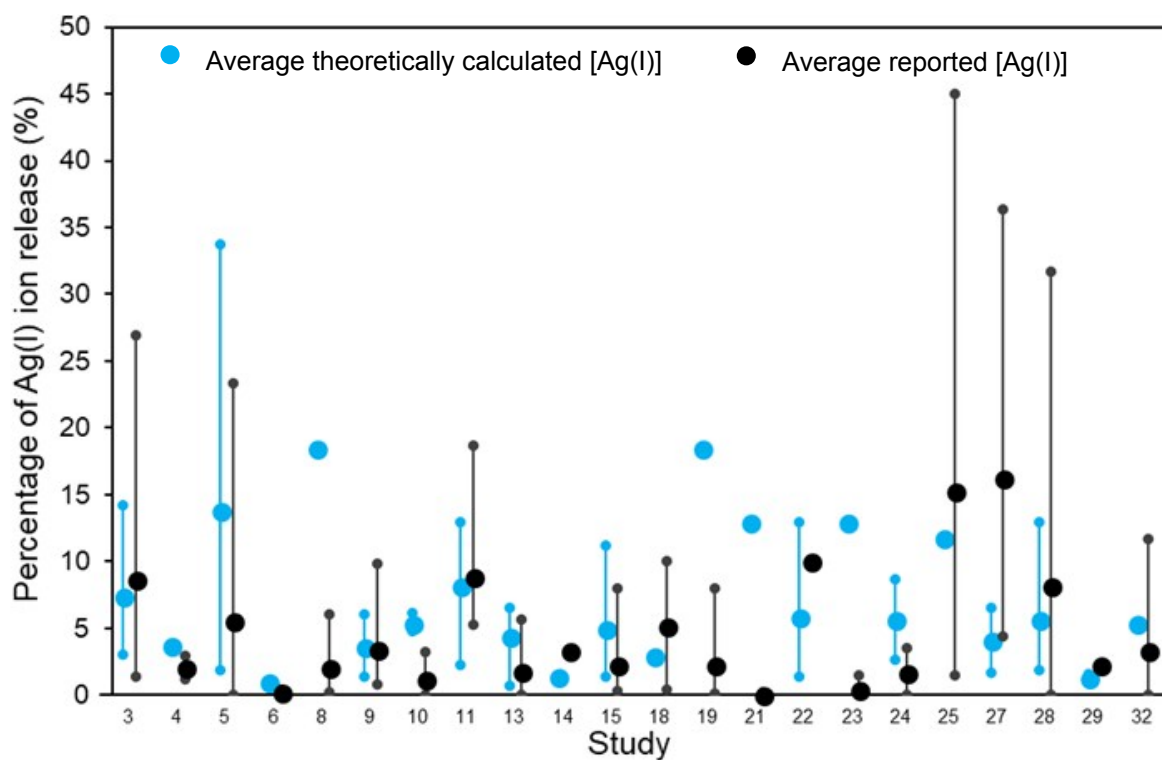

**Figure S2.** Comparison of the reported dissolution values in studies that measured dissolution to our theoretical calculations of dissolution. The middle data points represent the average dissolution value with the upper and lower data points representing the maximum and minimum dissolution values, respectively. Dissolution reported by the majority of studies (73%) align fully or partially with our theoretically calculated dissolution. Thus, the agreement between theoretical dissolution values and average reported dissolution values for the majority of studies further validates our calculation approach to determining an appropriate ion control. Note: The range for the reported dissolution includes different particle sizes, concentrations of AgNPs, different techniques to measure dissolution, and different media. The range for the theoretical calculations include different particle sizes and shapes.

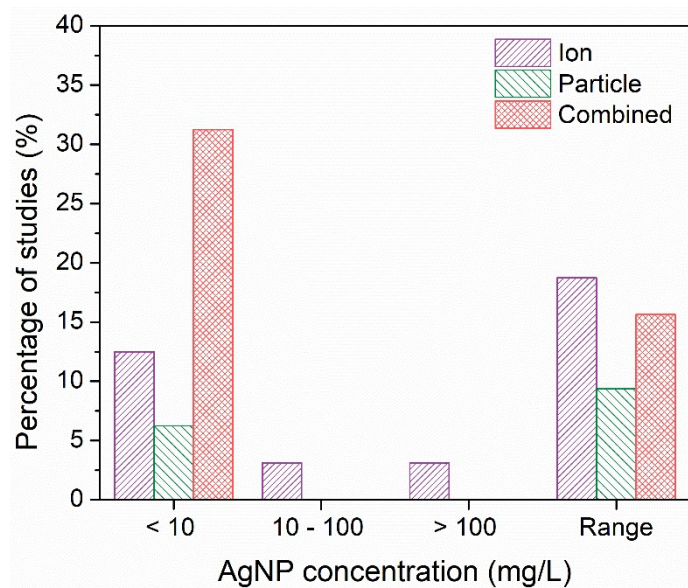

**Figure S3.** Ion-only, particle-only, and combined ion-particle conclusions drawn from studies that expose bacteria to <10 mg/L,<sup>4, 6-9, 11, 15, 16, 18, 22, 23, 25, 27, 31, 32</sup> 10-100 mg/L,<sup>20</sup> >100 mg/L,<sup>21</sup> and a range<sup>3, 5, 10, 12-14, 17, 19, 24, 26, 28-30</sup> of AgNP concentrations. No meaningful conclusion can be discerned.

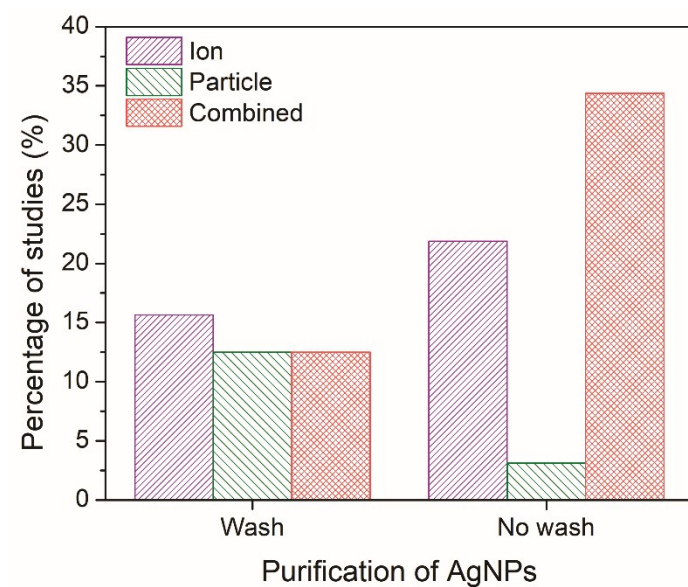

**Figure S4.** Ion-only, particle-only, and combined ion-particle conclusions drawn from studies that did<sup>3, 4, 8, 10-12, 20, 23, 25, 28, 32</sup> or did not<sup>5-7, 9, 13-19, 21, 22, 24, 26, 27, 29-31</sup> purify AgNPs post-synthesis. No meaningful conclusion can be discerned.



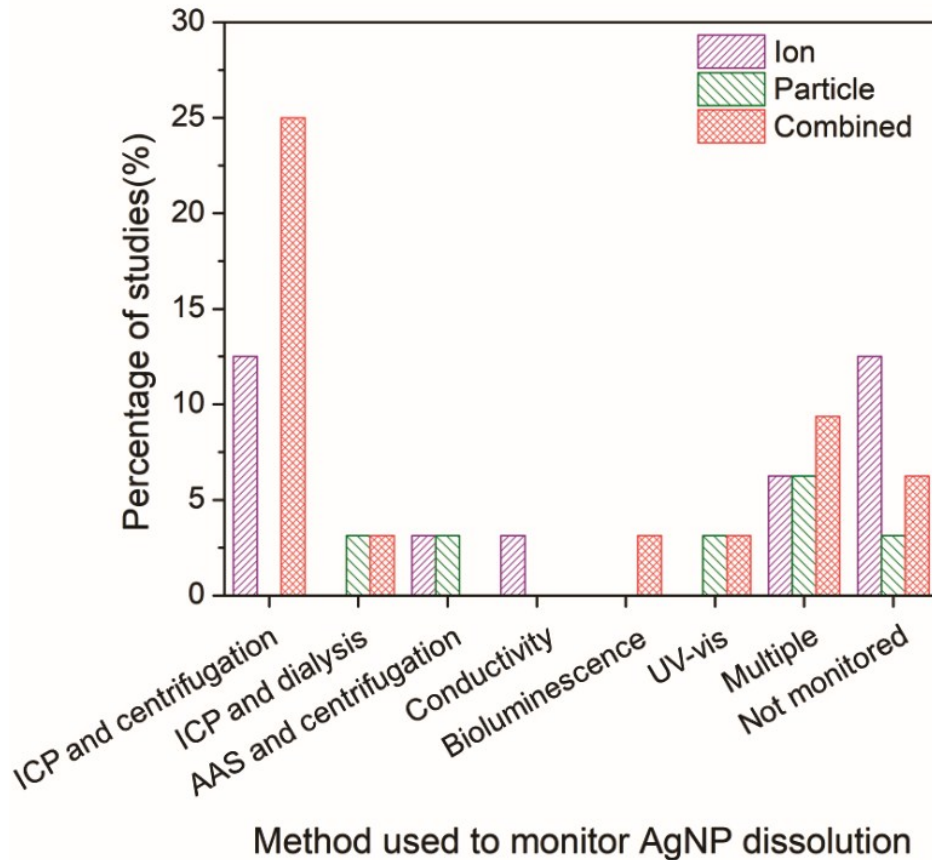

**Figure S5.** Ion-only, particle-only, and combined ion-particle conclusions drawn from studies that used ICP and centrifugation,<sup>4-6, 10, 13, 18, 23, 24, 27, 30, 32</sup> ICP and dialysis<sup>8, 9</sup> AAS and centrifugation,<sup>19, 28</sup> conductivity,<sup>17</sup> bioluminescence,<sup>14</sup> multiple methods,<sup>3, 11, 15, 22, 25, 29</sup> and no methods<sup>7, 12, 16, 20, 21, 26, 31</sup> to monitor dissolution. No meaningful conclusion can be discerned.

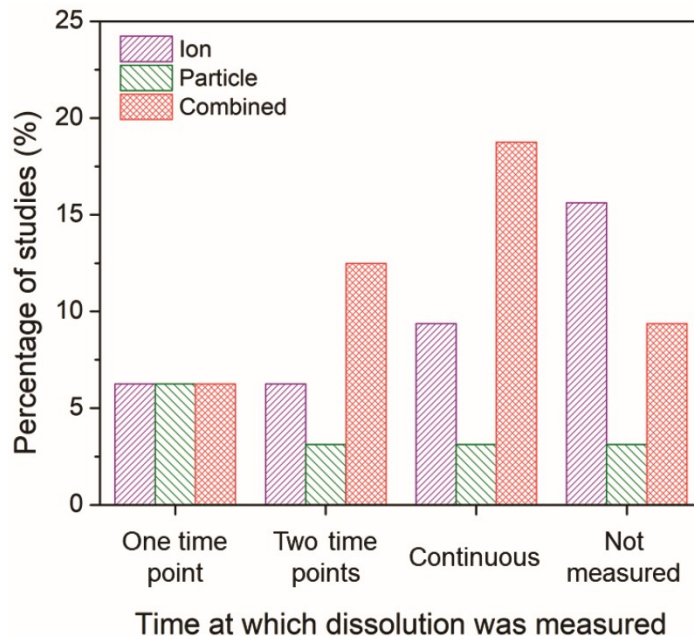

**Figure S6.** Ion versus particle conclusions drawn from studies that measure ion release at one time point,<sup>8, 13, 22, 27-29</sup> two time points,<sup>3, 4, 10, 14, 23</sup> continuously,<sup>5, 6, 9, 11, 15, 18, 19, 24, 25, 32</sup> or not at all<sup>7, 12, 16, 17, 20, 21, 26, 30, 31</sup>. Measuring dissolution is important for observing particle-only and combined ion-particle effects, especially at multiple time points.

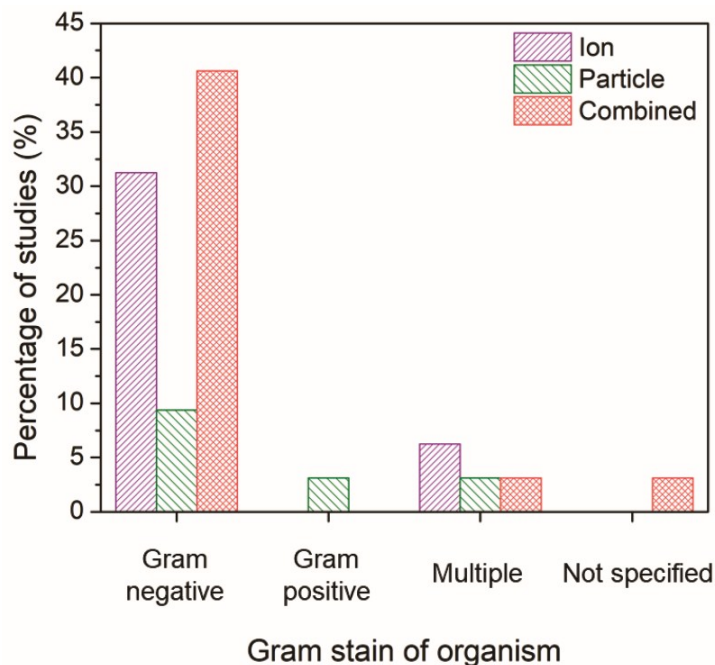

**Figure S7.** Ion-only, particle-only, and combined ion-particle conclusions drawn from studies that expose AgNPs and Ag(I) ions to only gram negative,<sup>3-7, 9, 10, 12-16, 19, 21-29, 31, 32</sup> gram positive,<sup>11</sup> both types,<sup>8, 17, 18, 20</sup> or unspecified<sup>30</sup> bacteria. No meaningful conclusion can be discerned.

## References

1. H. Hofmeister and G. L. Tan, Shape and internal structure of silver nanoparticles embedded in glass, *Journal of Materials Research*, 2005, **20**, 1551-1562.
2. S. Pal, Y. K. Tak and J. M. Song, Does the antibacterial activity of silver nanoparticles depend on the shape of the nanoparticle? A study of the Gram-negative bacterium *Escherichia coli*, *Appl Environ Microbiol*, 2007, **73**, 1712-1720.
3. A. Ivask, A. Elbadawy, C. Kaweeteerawat, D. Boren, H. Fischer, Z. Ji, C. H. Chang, R. Liu, T. Tolaymat, D. Telesca, J. I. Zink, Y. Cohen, P. A. Holden and H. A. Godwin, Toxicity mechanisms in *Escherichia coli* vary for silver nanoparticles and differ from ionic silver, *ACS Nano*, 2014, **8**, 374-386.
4. Z. M. Xiu, J. Ma and P. J. Alvarez, Differential effect of common ligands and molecular oxygen on antimicrobial activity of silver nanoparticles versus silver ions, *Environ Sci Technol*, 2011, **45**, 9003-9008.
5. Z. M. Xiu, Q. B. Zhang, H. L. Puppala, V. L. Colvin and P. J. Alvarez, Negligible particle-specific antibacterial activity of silver nanoparticles, *Nano Lett*, 2012, **12**, 4271-4275.
6. J. S. McQuillan, H. G. Infante, E. Stokes and A. M. Shaw, Silver nanoparticle enhanced silver ion stress response in *Escherichia coli* K12, *Nanotoxicology*, 2012, **6**, 857-866.
7. J. S. McQuillan and A. M. Shaw, Differential gene regulation in the Ag nanoparticle and Ag(+)-induced silver stress response in *Escherichia coli*: a full transcriptomic profile, *Nanotoxicology*, 2014, **8 Suppl 1**, 177-184.
8. E. Amato, Y. A. Diaz-Fernandez, A. Taglietti, P. Pallavicini, L. Pasotti, L. Cucca, C. Milanese, P. Grisoli, C. Dacarro, J. M. Fernandez-Hechavarria and V. Necchi, Synthesis, characterization and antibacterial activity against Gram positive and Gram negative bacteria of biomimetically coated silver nanoparticles, *Langmuir*, 2011, **27**, 9165-9173.
9. A. D. Burchardt, R. N. Carvalho, A. Valente, P. Nativo, D. Gilliland, C. P. Garcia, R. Passarella, V. Pedroni, F. Rossi and T. Lettieri, Effects of silver nanoparticles in diatom *Thalassiosira pseudonana* and cyanobacterium *Synechococcus* sp, *Environ Sci Technol*, 2012, **46**, 11336-11344.
10. C. L. Arnaout and C. K. Gunsch, Impacts of silver nanoparticle coating on the nitrification potential of *Nitrosomonas europaea*, *Environ Sci Technol*, 2012, **46**, 5387-5395.
11. A. M. El Badawy, R. G. Silva, B. Morris, K. G. Scheckel, M. T. Suidan and T. M. Tolaymat, Surface Charge-Dependent Toxicity of Silver Nanoparticles, *Environmental Science and Technology*, 2011, **45**, 283-287.
12. C. R. Bowman, F. C. Bailey, M. Elrod-Erickson, A. M. Neigh and R. R. Otter, Effects of silver nanoparticles on zebrafish (*Danio rerio*) and *Escherichia coli* (ATCC 25922): a comparison of toxicity based on total surface area versus mass concentration of particles in a model eukaryotic and prokaryotic system, *Environ Toxicol Chem*, 2012, **31**, 1793-1800.
13. A. Georgantzopoulou, Y. L. Balachandran, P. Rosenkranz, M. Dusinska, A. Lankoff, M. Wojewodzka, M. Kruszewski, C. Guignard, J. N. Audinot, S. Girija, L. Hoffmann and A. C. Gutleb, Ag nanoparticles: size- and surface-dependent effects on model aquatic organisms and uptake evaluation with NanoSIMS, *Nanotoxicology*, 2013, **7**, 1168-1178.
14. A. Ivask, O. Bondarenko, N. Jephthina and A. Kahru, Profiling of the reactive oxygen species-related ecotoxicity of CuO, ZnO, TiO<sub>2</sub>, silver and fullerene nanoparticles using a set of recombinant luminescent *Escherichia coli* strains: differentiating the impact of particles and solubilised metals, *Anal Bioanal Chem*, 2010, **398**, 701-716.
15. A. Ivask, I. Kurvet, K. Kasemets, I. Blinova, V. Aruoja, S. Suppi, H. Vija, A. Kakinen, T. Titma, M. Heinlaan, M. Visnapuu, D. Koller, V. Kisand and A. Kahru, Size-dependent toxicity of silver

- nanoparticles to bacteria, yeast, algae, crustaceans and mammalian cells in vitro, *PLoS One*, 2014, **9**, e102108.
16. M. A. Radzig, V. A. Nadtochenko, O. A. Koksharova, J. Kiwi, V. A. Lipasova and I. A. Khmel, Antibacterial effects of silver nanoparticles on gram-negative bacteria: influence on the growth and biofilms formation, mechanisms of action, *Colloids Surf B Biointerfaces*, 2013, **102**, 300-306.
  17. A. B. Smetana, K. J. Klabunde, G. R. Marchin and C. M. Sorensen, Biocidal activity of nanocrystalline silver powders and particles, *Langmuir*, 2008, **24**, 7457-7464.
  18. M. A. Doody, D. Wang, H. P. Bais and Y. Jin, Differential antimicrobial activity of silver nanoparticles to bacteria *Bacillus subtilis* and *Escherichia coli*, and toxicity to crop plant *Zea mays* and beneficial *B. subtilis*-inoculated *Z. mays*, *Journal of Nanoparticle Research*, 2016, **18**, 290.
  19. N. T. Giao, T. Limpiyakorn, P. Kunapongkiti, P. Thuptimdang and S. Siripattanakul-Ratpukdi, Influence of silver nanoparticles and liberated silver ions on nitrifying sludge: ammonia oxidation inhibitory kinetics and mechanism, *Environ Sci Pollut Res Int*, 2017, **24**, 9229-9240.
  20. C. Greulich, D. Braun, A. Peetsch, J. Diendorf, B. Siebers, M. Epple and M. Koller, The toxic effect of silver ions and silver nanoparticles towards bacteria and human cells occurs in the same concentration range, *RSC Advances*, 2012, **2**, 6981-6987.
  21. N. Hachicho, P. Hoffmann, K. Ahlert and H. J. Heipieper, Effect of silver nanoparticles and silver ions on growth and adaptive response mechanisms of *Pseudomonas putida* mt-2, *FEMS Microbiol Lett*, 2014, **355**, 71-77.
  22. W. Hong, L. Li, J. Liang, J. Wang, X. Wang, S. Xu, L. Wu, G. Zhao, A. Xu and S. Chen, Investigating the environmental factors affecting the toxicity of silver nanoparticles in *Escherichia coli* with dual fluorescence analysis, *Chemosphere*, 2016, **155**, 329-335.
  23. Y. M. Long, L. G. Hu, X. T. Yan, X. C. Zhao, Q. F. Zhou, Y. Cai and G. B. Jiang, Surface ligand controls silver ion release of nanosilver and its antibacterial activity against *Escherichia coli*, *Int J Nanomedicine*, 2017, **12**, 3193-3206.
  24. A. Masrahi, A. R. VandeVoort and Y. Arai, Effects of silver nanoparticle on soil-nitrification processes, *Arch Environ Contam Toxicol*, 2014, **66**, 504-513.
  25. M. A. Maurer-Jones, M. P. S. Mousavi, L. D. Chen, P. Buhlmann and C. L. Haynes, Characterization of silver ion dissolution from silver nanoparticles using fluoruous-phase ion-selective electrodes and assessment of resultant toxicity to *Shewanella oneidensis*, *Chemical Science*, 2013, **4**, 2564-2572.
  26. J. J. Ortega-Calvo, R. Molina, C. Jimenez-Sanchez, P. J. Dobson and I. P. Thompson, Bacterial tactic response to silver nanoparticles, *Environ Microbiol Rep*, 2011, **3**, 526-534.
  27. T. S. Radniecki, D. P. Stankus, A. Neigh, J. A. Nason and L. Semprini, Influence of liberated silver from silver nanoparticles on nitrification inhibition of *Nitrosomonas europaea*, *Chemosphere*, 2011, **85**, 43-49.
  28. T. Silva, L. R. Pokhrel, B. Dubey, T. M. Tolaymat, K. J. Maier and X. Liu, Particle size, surface charge and concentration dependent ecotoxicity of three organo-coated silver nanoparticles: comparison between general linear model-predicted and observed toxicity, *Sci Total Environ*, 2014, **468-469**, 968-976.
  29. M. Visnapuu, U. Joost, K. Juganson, K. Kunnis-Beres, A. Kahru, V. Kisand and A. Ivask, Dissolution of silver nanowires and nanospheres dictates their toxicity to *Escherichia coli*, *Biomed Res Int*, 2013, **2013**, 819252.
  30. Y. Yang, J. Quensen, J. Mathieu, Q. Wang, J. Wang, M. Li, J. M. Tiedje and P. J. Alvarez, Pyrosequencing reveals higher impact of silver nanoparticles than Ag<sup>+</sup> on the microbial community structure of activated sludge, *Water Res*, 2014, **48**, 317-325.

31. A. P. Zarubina, L. I. Deev, I. M. Parkhomenko, E. Y. Parshina, A. S. Sarycheva, L. A. Novoselova, E. P. Lukashev, A. I. Netrusov and A. B. Rubin, Evaluation of Toxicity of Silver Ions and Nanoparticles using Model Bacteria with Luminescent Phenotype, *Nanotechnologies in Russia*, 2015, **10**, 475-483.
32. K. A. Johnston, L. M. Stabryla, A. M. Smith, X. Y. Gan, L. M. Gilbertson and J. E. Millstone, Impacts of broth chemistry on silver ion release, surface chemistry composition, and bacterial cytotoxicity of silver nanoparticles, *Environmental Science: Nano*, 2018, **5**, 304-312.
